# Supplementary material for: Co-MOF-derived core–shell CoP@Co3O4 nanoparticle loaded N-doped graphene: an efficient catalyst for the oxygen evolution reaction
Source: Royal Society of Chemistry journal article supplement (doi:10.1039/d4ta07696f), 2024-11-19
Supplement: d4ta07696f1.pdf [file d4ta07696f1.pdf]

# Co-MOF-derived core-shell CoP@Co<sub>3</sub>O<sub>4</sub> nanoparticle loaded N-doped graphene: An efficient catalyst for oxygen evolution reaction

Xian-Chen Meng,<sup>a</sup> Jian Luan,<sup>a\*</sup> Yi Liu,<sup>a</sup> Yu-Shu Sheng,<sup>a</sup> Fu-Yu Guo,<sup>a</sup> Peng Zheng,<sup>b</sup> Wen-Long Duan,<sup>a\*</sup> and Wen-Ze Li<sup>a\*</sup>

<sup>a</sup> College of Science, Shenyang University of Chemical Technology, Shenyang, 110142, P. R. China

<sup>b</sup> Key Laboratory on Resources Chemicals and Materials of Ministry of Education, Shenyang University of Chemical Technology, Shenyang, 110142, P. R. China

E-mails: [jluan@syuct.edu.cn](mailto:jluan@syuct.edu.cn) (J. Luan); [wlduan@syuct.edu.cn](mailto:wlduan@syuct.edu.cn) (W. L. Duan); [wzli@syuct.edu.cn](mailto:wzli@syuct.edu.cn) (W. Z. Li)

## S1. Experimental section

### S1.1 Materials and methods.

The 3-dpyb was synthesized according to the method reported in another literature.<sup>1</sup> Other chemicals and reagents purchased from commercial sources without further processing for purification were utilized for synthesis of MOFs and their pyrolysis products.

### S1.2 Preparation of Co-MOFs.

#### S1.2.1 Synthesis of {[Co(3-dpyb)(1,3-BDC)]·H<sub>2</sub>O}<sub>n</sub> (Co-MOF-H).

In a 25 mL Teflon-lined autoclave, a combination of CoCl<sub>2</sub>·6H<sub>2</sub>O (0.047 g, 0.20 mmol), 3-dpyb (0.030 g, 0.10 mmol), 1,3-BDC (0.025 g, 0.15 mmol), NaOH (0.008 g, 0.20 mmol), and H<sub>2</sub>O (6 mL) was heated at 120 °C for 4 days. Following that, the mixture in the autoclave was naturally cooled to room temperature, resulting in the formation of purple block crystals of Co-MOF-H (44% yield based on Co). Theoretical values of elemental analysis for C<sub>24</sub>H<sub>24</sub>CoN<sub>4</sub>O<sub>7</sub> (%): C, 53.44; N, 10.39; H, 4.48; found: C, 53.44; N, 10.38; H, 4.48. FTIR (KBr, cm<sup>-1</sup>): 3110 (s), 1680 (w), 1650 (m), 1611 (m), 1570 (m), 1470 (m), 1400 (s), 1320 (w), 1160 (w), 1110 (w), 1070 (w), 1040 (w), 831 (w), 744 (w), 721 (w), 700 (w), 646 (w).

### S1.2.2 Synthesis of $\{[\text{Co}(\text{3-dpyb})(\text{5-MIP})] \cdot \text{H}_2\text{O}\}_n$ (Co-MOF-CH<sub>3</sub>).

To synthesize Co-MOF-CH<sub>3</sub>, use the same procedure as for Co-MOF-H, except for replacing 1,3-H<sub>2</sub>BDC to 5-H<sub>2</sub>MIP (0.027 g, 0.15 mmol). Purple block crystals of Co-MOF-CH<sub>3</sub> were obtained in 27% yield based on Co. Theoretical values of elemental analysis for C<sub>25</sub>H<sub>26</sub>CoN<sub>4</sub>O<sub>7</sub> (%): C, 54.25; N, 10.12; H, 4.74; found: C, 54.25; N, 10.13; H, 4.72. FTIR (KBr, cm<sup>-1</sup>): 3110 (s), 1680 (m), 1640(m), 1590 (m), 1540 (m), 1422 (m), 1400 (s), 1320 (w), 1250 (w), 1200 (w), 1160 (w), 1110 (w), 1040 (w), 930 (w), 839 (w), 796 (w), 773 (w), 725 (w), 700 (w), 646 (w), 600 (w).

### S1.2.3 Synthesis of $\{[\text{Co}_2(\text{3-dpyb})_2(\text{5-HIP})_2] \cdot 11\text{H}_2\text{O}\}_n$ (Co-MOF-OH).

To synthesize Co-MOF-OH, use the same procedure as for Co-MOF-H, except for replacing 1,3-H<sub>2</sub>BDC to 5-H<sub>2</sub>HIP (0.027 g, 0.15 mmol). Purple block crystals of Co-MOF-OH were obtained in 42% yield based on Co. Theoretical values of elemental analysis for C<sub>48</sub>H<sub>66</sub>Co<sub>2</sub>N<sub>8</sub>O<sub>25</sub> (%): C, 45.29; N, 8.80; H, 5.23; found: C, 45.28; N, 8.79; H, 5.22. FTIR (KBr, cm<sup>-1</sup>): 3120 (s), 1640 (w), 1580 (w), 1400 (s), 791 (w), 723 (w), 702 (w).

### S1.2.4 Synthesis of $\{[\text{Co}_3(\text{3-dpyb})_3(\text{5-SIP})_2(\text{H}_2\text{O})_8] \cdot 4\text{H}_2\text{O}\}_n$ (Co-MOF-SO<sub>3</sub>).

To synthesize Co-MOF-SO<sub>3</sub>, use the same procedure as for Co-MOF-H, except for replacing 1,3-H<sub>2</sub>BDC to 5-H<sub>3</sub>SIP (0.037 g, 0.15 mmol). Pink block crystals of Co-MOF-SO<sub>3</sub> were obtained in 21% yield based on Co. Theoretical values of elemental analysis for C<sub>64</sub>H<sub>84</sub>Co<sub>3</sub>N<sub>12</sub>O<sub>32</sub>S<sub>2</sub> (%): C, 43.32; N, 9.48; H, 4.77; found: C, 43.32; N, 9.48; H, 4.77. FTIR (KBr, cm<sup>-1</sup>): 3120 (s), 1610 (m), 1600 (m), 1550 (m), 1480 (w), 1400 (s), 1210 (w), 1190 (w), 1110 (w), 1040 (w), 785 (w), 706(w), 629(w).

### S1.2.5 Synthesis of $\{[\text{Co}(\text{3-dpyb})(\text{5-NIP})] \cdot \text{H}_2\text{O}\}_n$ (Co-MOF-NO<sub>2</sub>).

To synthesize Co-MOF-NO<sub>2</sub>, use the same procedure as for Co-MOF-H, except for replacing 1,3-H<sub>2</sub>BDC to 5-H<sub>2</sub>NIP (0.031 g, 0.15 mmol). Pink block crystals of Co-MOF-NO<sub>2</sub> were obtained in 36% yield based on Co. Theoretical values of elemental analysis for C<sub>24</sub>H<sub>23</sub>CoN<sub>5</sub>O<sub>9</sub> (%): C, 49.32; N, 11.99; H, 3.97; found: C, 49.31; N, 11.96; H, 3.95. FTIR (KBr, cm<sup>-1</sup>): 3120 (s), 1630 (s), 1540 (s), 1460 (m), 1400 (s), 1350 (w), 1320 (w), 1200 (w), 1160 (w), 1110 (w), 1080 (w), 1040(w), 926 (w), 874 (w), 829 (w), 789 (w), 735 (m), 717 (m), 702 (m), 646 (w).

## S2. Characterization

Crystallographic data for Co-MOF-H, Co-MOF-CH<sub>3</sub>, Co-MOF-OH, Co-MOF-SO<sub>3</sub>, Co-MOF-NH<sub>2</sub> and Co-MOF-NO<sub>2</sub> were collected using a Bruker SMART APEX II. All structures were resolved using the SHELXTL software.<sup>2</sup> Table S1 summarized the crystal parameters, the data collecting parameters, and the refinement data. Tables S2-S7 listed the selected bond distances and bond angles. CCDC numbers: 988387, 2361269-2361273 for Co-MOF-H, Co-MOF-CH<sub>3</sub>, Co-MOF-OH, Co-MOF-SO<sub>3</sub>, Co-MOF-NH<sub>2</sub> and Co-MOF-NO<sub>2</sub> can be obtained via [www.ccdc.cam.ac.uk/data\\_request/cif](http://www.ccdc.cam.ac.uk/data_request/cif). The elemental analyses (C, H, and N) were determined with the use of a Perkin-Elmer 240C elemental analyzer. FTIR spectra (KBr pellets) were recorded with a Varian 640-IR spectrometer over the range of 4000–500 cm<sup>-1</sup>. The thermogravimetric analysis (TGA) experiments were performed using a PerkinElmer TGA analyzer. Powder X-ray diffraction (PXRD) data was collected using a Bruker D8 ADVANCE with CuK $\alpha$  radiation to study phase purity and crystal structure by scanning within 2 $\theta$  range of 5°-90°, step size 3°/min. The external texture and shape of the carbon samples were characterized by scanning electron microscopy (FESEM, \*JSM-IT800, JEOL) and high resolution transmission electron microscopy (HRTEM, JEOL2010 at 200 kV). Laser Raman spectroscopy was used to estimate the quality of the carbon-based materials. X-ray photoelectron spectroscopy (XPS) was performed using an Escalab 250 with an Al K $\alpha$  radiation. The Renishaw inVia Raman spectrometer cooperated with Ar-ion laser of 633 nm wavelength is used to investigate Raman scattering signals. Specific surface area and pore size distribution of samples were identified by nitrogen adsorption/desorption at 77 K using a BUILDER SSA-6000 instrument according to the Barrett-Joyner-Halenda (BJH) method.

## S3. Electrochemical measurements

The OER catalytic performance were determined with a CHI 660E electrochemical

workstation (CHI 660E, Shanghai, China). Adopt the system of three-electrode to evaluate the electrochemical activity of commercial catalyst ( $\text{RuO}_2$ ) and the materials of Co-MOF-C serials. Co-MOF-C (5 mg), ethanol (1 mL), Nafion (30  $\mu\text{L}$ ) were mixed in room temperature by ultrasonication for 30 min respectively to prepare the catalyst ink. And a glassy carbon electrode with a diameter of 3.0 mm, graphite rod and HgO/Hg electrode were used as the working electrode, counter electrode and reference electrode, respectively. 3  $\mu\text{L}$  catalyst ink was dripped on the glassy carbon electrode polished with  $\text{Al}_2\text{O}_3$  (1  $\mu\text{m}$ , 0.3  $\mu\text{m}$  and 0.05  $\mu\text{m}$ ) to form a thin film with the catalyst loading of 0.2  $\text{mg cm}^{-2}$  and naturally dried at room temperature to prepare the working electrode. The commercial  $\text{RuO}_2$  catalyst powder was prepared using the same method. And all the electrochemical experiments were conducted in 1 M KOH aqueous solution. Linear sweep voltammetry (LSV) was measured at a scan rate of 10  $\text{mV s}^{-1}$  and were referenced to the reversible hydrogen electrode (RHE) according to the following equation:  $E_{\text{RHE}} = E_{\text{HgO/Hg}} + E_{\text{HgO/H}}(\text{reference}) + 0.059 \times \text{pH}$ . Whereas the value of  $E_{\text{HgO/Hg}}(\text{reference})$  is 0.098 V, and none of the LSV curves have been  $iR$  corrected. Tafel slopes were analyzed according to equation,  $\eta = a + b(\log |j|)$ . Wherein,  $a$  is constant and  $b$  is the Tafel slope and  $j$  is current density. Electrochemical impedance spectroscopy was determined in a frequency range of 1- $10^6$  Hz with an amplitude of 5 mV at a given potential. Electrochemical double-layer was calculated by different scan rates of Cyclic voltammetry (CV) measurement at nonfaradaic potential region. The stability of the catalyst was measured by I-t test.

#### **S4. Density functional theory calculations**

In this study, we perform density functional theory (DFT) calculations using the Perdew-Burke-Ernzerhof (PBE) formula in generalized gradient approximation (GGA) using first principles.<sup>3, 4</sup> All theoretical calculations were carried out in the Vienna Ab-initio Simulation Package (VASP). The exchange-correlation effects were described by the Perdew-Burke-Ernzerhof (PBE). Projector-Augmented Wave (PAW) pseudopotentials were used to deal with the core valence interactions, and a cutoff

energy of 400 eV was used. The Castep module in MS was used to optimize the energy of the established model. In the optimization of geometric structure, all calculations reached the convergence standard when the energy and force were reduced to  $10^{-5}$  eV and  $0.01 \text{ eV \AA}^{-1}$ . The Brillouin zone integration is performed using  $1 \times 1 \times 1$  Monkhorst-Pack k-point sampling for a structure. Partial occupancies of the Kohn–Sham orbitals were allowed using the Gaussian smearing method with width of 0.05 eV. The electronic energy was considered self-consistent when the energy change was smaller than  $10^{-5}$  eV. A geometry optimization was considered convergent when the energy change was smaller than  $0.03 \text{ eV \AA}^{-1}$ . The vacuum space of 30 Å was chosen to eliminate reactions between plates.

The OER activity of the catalyst was calculated using the computational hydrogen electrode (CHE) model developed by Nørskov et al.<sup>5</sup> Specifically, the OER process involves four elementary steps, as shown below:

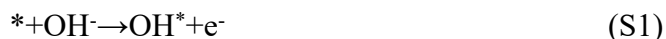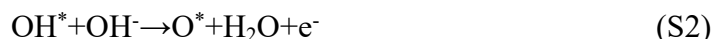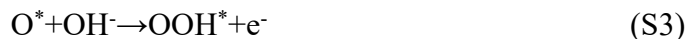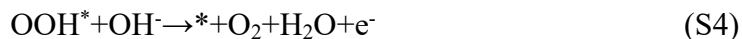

where \* is the active site of the catalyst. The Gibbs free energy change ( $\Delta G$ ) of each elementary step can be computed by:

$$\Delta G = \Delta E + \Delta \text{ZPE} - T \Delta S + \Delta G_U \quad (\text{S5})$$

where  $\Delta E$  is the calculated binding energy change of the intermediates,  $\Delta \text{ZPE}$  and  $\Delta S$  represent the zero-point and entropy changes of each step.  $\Delta G_U = -eU$  with  $U$  representing the applied potential.

## S5. Crystal structure of Co-MOFs

Co-MOF-H was proved to the  $P\bar{1}$  space group of the triclinic system by crystallographic analysis. The centre metal ion Co(II) connected to two pyridine N atom from two 3-dpyb ligands and four O atoms of three 1,3-BDC anions (Fig. S1a). Wherein, the bond of lengths Co–O and Co–N are in the range of 2.0321(19)–2.312(2)

Å, which are all belonging to the normal ranges. And the two carboxyl of 1,3-BDC anions show two different coordination forms. One 1,3-BDC anion coordinates to three Co(II) ions, which constitute a 1D  $[\text{Co}(1,3\text{-BDC})]_{2n}$  chain (Fig. S1b). Moreover, the 3-dpyb ligands show a bis(monodentate) bridging coordination mode, which link by Co(II) ions to generate a 1D *meso*-helical  $[\text{Co}(3\text{-dpyb})]_n$  chain (Fig. S1c). Such *meso*-helical  $[\text{Co}(3\text{-dpyb})]_n$  chains bridge the adjacent  $[\text{Co}(1,3\text{-BDC})]_{2n}$  chains to generate a 2D framework (Fig. S1d). From the topological view, if each binuclear Co cluster is considered as a 4-connected node and the 1,3-BDC anions and 3-dpyb ligands are considered as linkers, the structure of Co-MOF can be simplified as a sql network (Fig. 1e).

Crystal structure of Co-MOF-CH<sub>3</sub> was exhibited in Fig. S2, which is same as the structure of Co-MOF-H, except for the bond of lengths Co–O and Co–N are in the range of 2.0265(17)–2.352(2) Å.

Crystal structure of Co-MOF-OH was exhibited in Fig. S3, which is same as the structure of Co-MOF-H, except for the bond of lengths Co–O and Co–N are in the range of 2.011(3)–2.344(3) Å. Notably, the 2D framework of the structure contains polynuclear water clusters.

Crystal structure of Co-MOF-NO<sub>2</sub> was exhibited in Fig. S4, which is same as the structure of Co-MOF-H, except for the bond of lengths Co–O and Co–N are in the range of 2.031(4)–2.295(4) Å.

Co-MOF-SO<sub>3</sub> was proved to the *P*-1 space group of the triclinic system by crystallographic analysis. Two crystallographically independent Co(II) ions are connected to two pyridine N atom from two 3-dpyb ligands and one O atoms of one 5-SIP anions and three coordinated water molecules (Figs. S5a and S5b). Wherein, the bond of lengths Co–O and Co–N are in the range of 2.0640(19)–2.179(2) Å, which are all belonging to the normal ranges. In this structure, one 5-SIP anion coordinates to two Co(II) ions, which constitute a Co<sub>3</sub>(5-SIP)<sub>2</sub> trinuclear unit (Fig. S5c). Moreover, the 3-dpyb ligands show a bis(monodentate) bridging coordination mode, which link by Co(II) ions to generate a 1D zigzag  $[\text{Co}(3\text{-dpyb})]_n$  chain (Fig. S5d). Such zigzag  $[\text{Co}(3\text{-dpyb})]_n$  chains bridge the adjacent Co<sub>3</sub>(5-SIP)<sub>2</sub> chains to

generate a 2D framework (Fig. S5e). From the topological view, if Co(II) ion is considered as a 3/4-connected node and the 5-SIP anions and 3-dpyb ligands are considered as linkers, the structure of Co-MOF-SO<sub>3</sub> can be simplified as a 3,4-connected network with (4·6<sup>2</sup>)<sub>2</sub>(4<sup>2</sup>·6<sup>2</sup>·8<sup>2</sup>) topology (Fig. S5f).

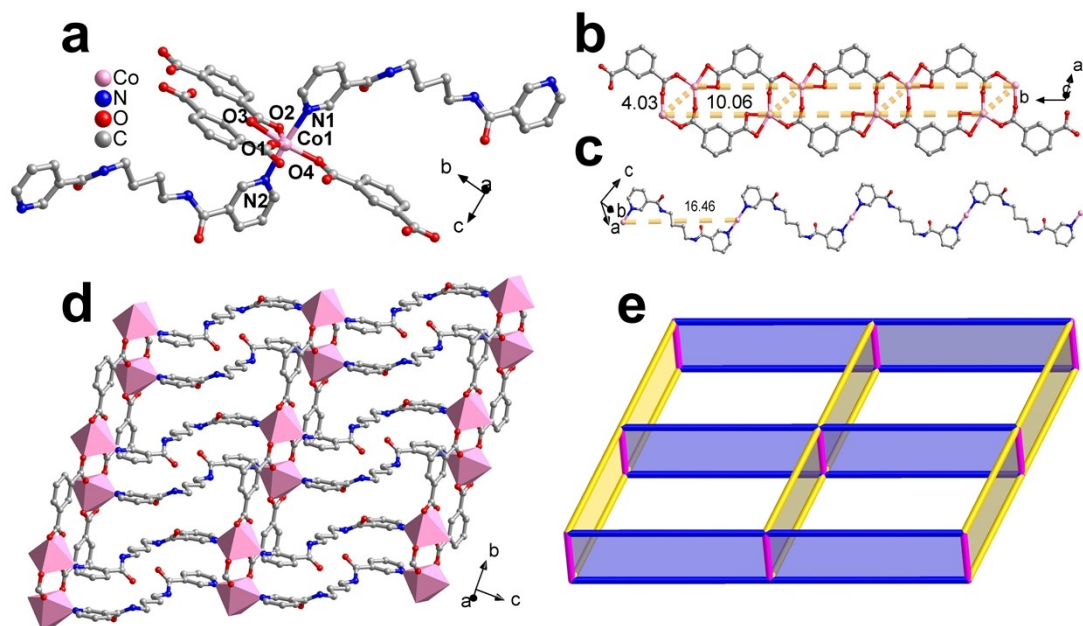

**Fig. S1** (a) Coordination environment of the Co(II) ion in Co-MOF-H. (b) View of the 1D  $[\text{Co}(1,3\text{-BDC})]_{2n}$  chain. (c) The form of 3-dpyb linking 1D  $[\text{Co}(3\text{-dpyb})]_n$  chain. (d) 2D structure of Co-MOF. (e) Topological schematic of Co-MOF.

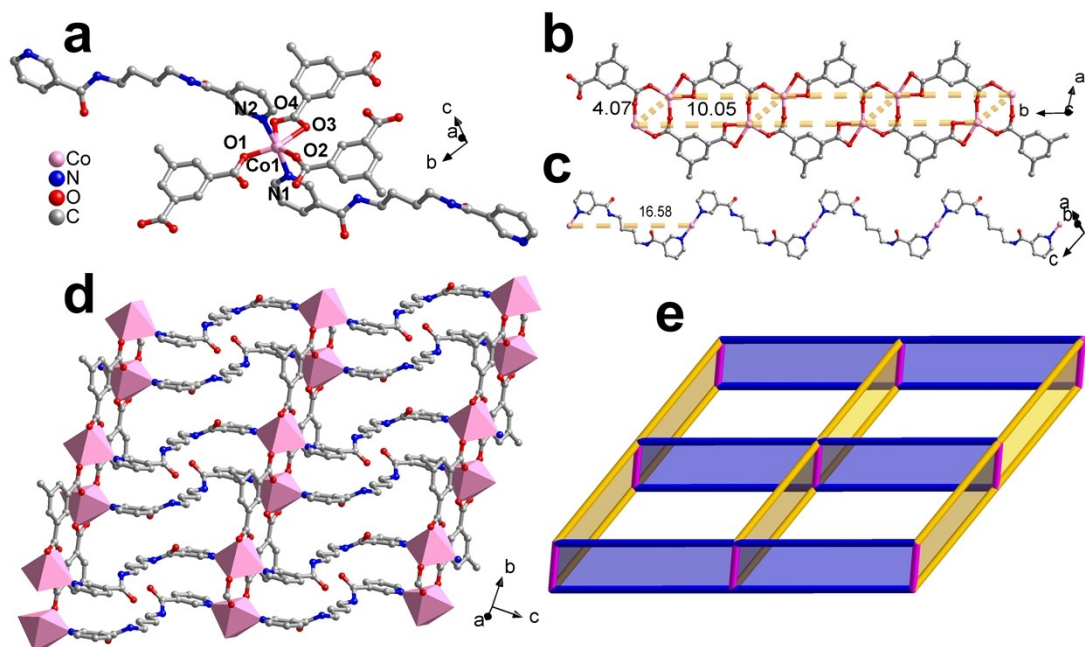

**Fig. S2** (a) Coordination environment of the Co(II) ion in Co-MOF-CH<sub>3</sub>. (b) View of the 1D  $[\text{Co}(1,3\text{-MIP})]_{2n}$  chain. (c) The form of 3-dpyb linking 1D  $[\text{Co}(3\text{-dpyb})]_n$  chain. (d) 2D structure of Co-MOF-CH<sub>3</sub>. (e) Topological schematic of Co-MOF-CH<sub>3</sub>.



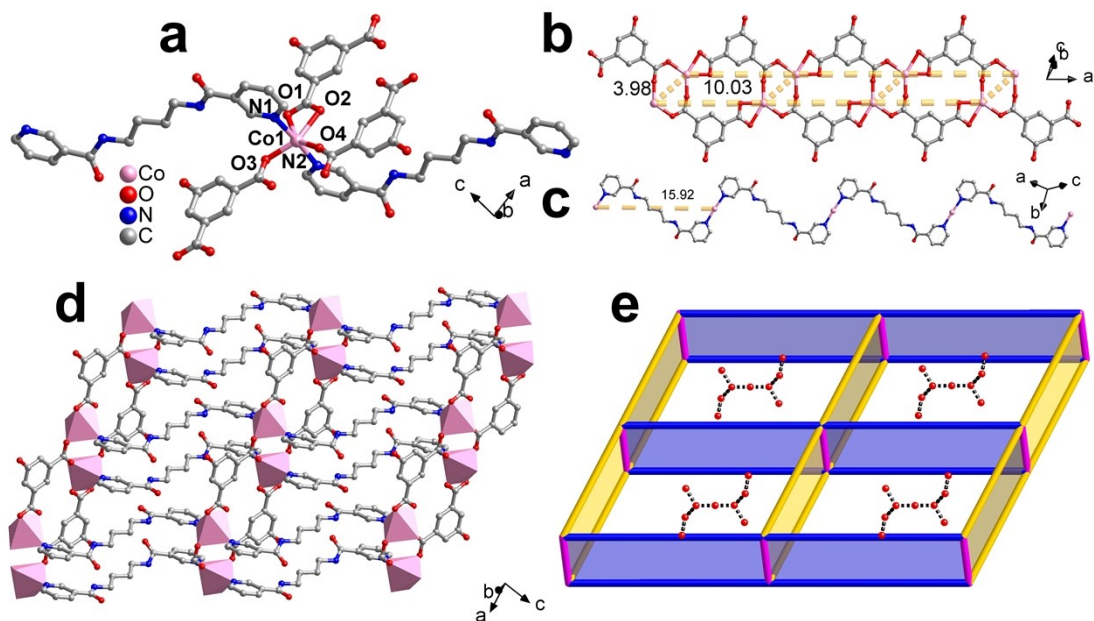

**Fig. S3** (a) Coordination environment of the Co(II) ion in Co-MOF-OH. (b) View of the 1D  $[\text{Co}(1,3\text{-HIP})]_{2n}$  chain. (c) The form of 3-dpyb linking 1D  $[\text{Co}(3\text{-dpyb})]_n$  chain. (d) 2D structure of Co-MOF-OH. (e) Topological schematic of Co-MOF-OH.

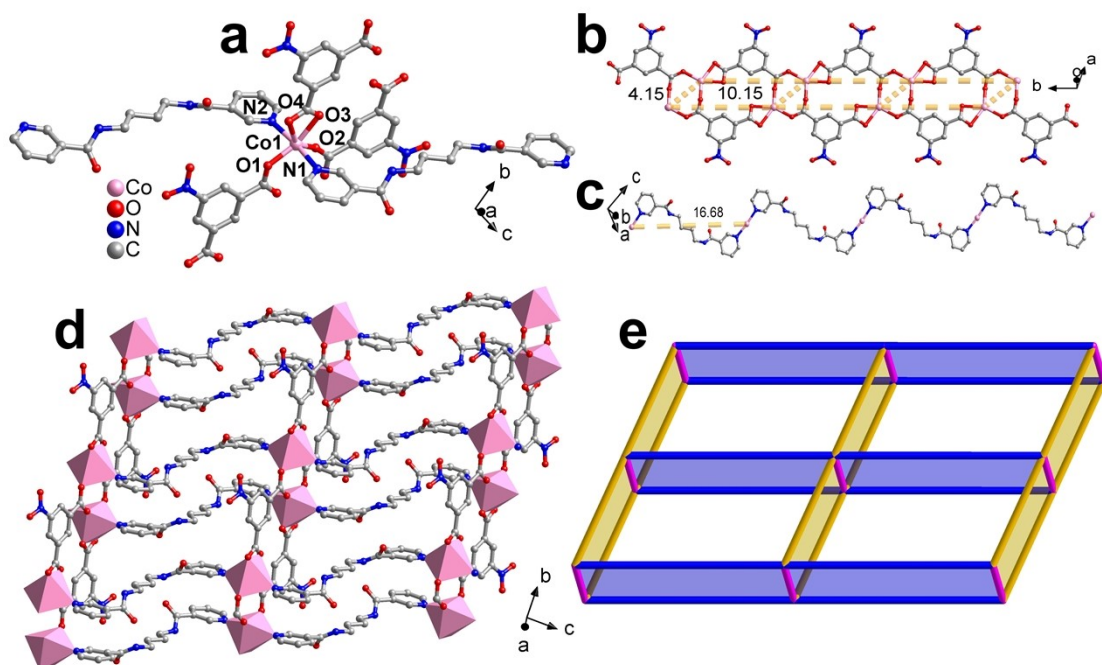

**Fig. S4** (a) Coordination environment of the Co(II) ion in Co-MOF-NO<sub>2</sub>. (b) View of the 1D  $[\text{Co}(1,3\text{-NIP})]_{2n}$  chain. (c) The form of 3-dpyb linking 1D  $[\text{Co}(3\text{-dpyb})]_n$  chain. (d) 2D structure of Co-MOF-NO<sub>2</sub>. (e) Topological schematic of Co-MOF-NO<sub>2</sub>.

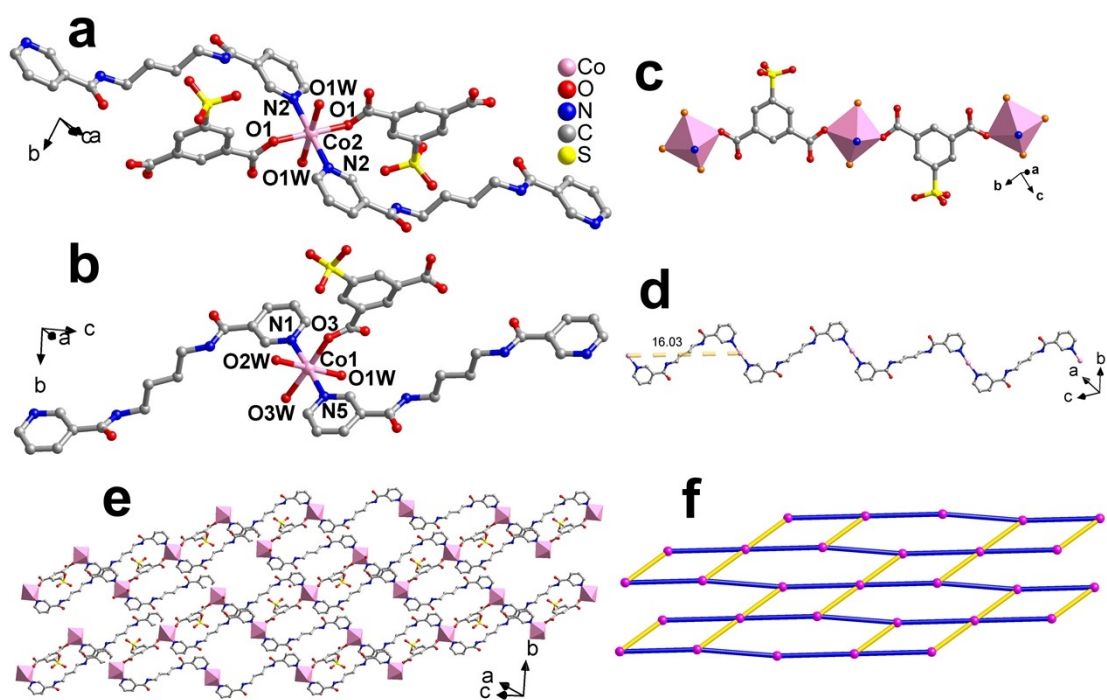

**Fig. S5** (a and b) Coordination environment of the Co(II) ion in Co-MOF-SO<sub>3</sub>. (c) View of the Co<sub>2</sub>(5-SIP)<sub>2</sub> binuclear unit. (d) The form of 3-dpyb linking 1D [Co(3-dpyb)]<sub>n</sub> chain. (e) 2D structure of Co-MOF-SO<sub>3</sub>. (f) Topological schematic of Co-MOF-SO<sub>3</sub>.

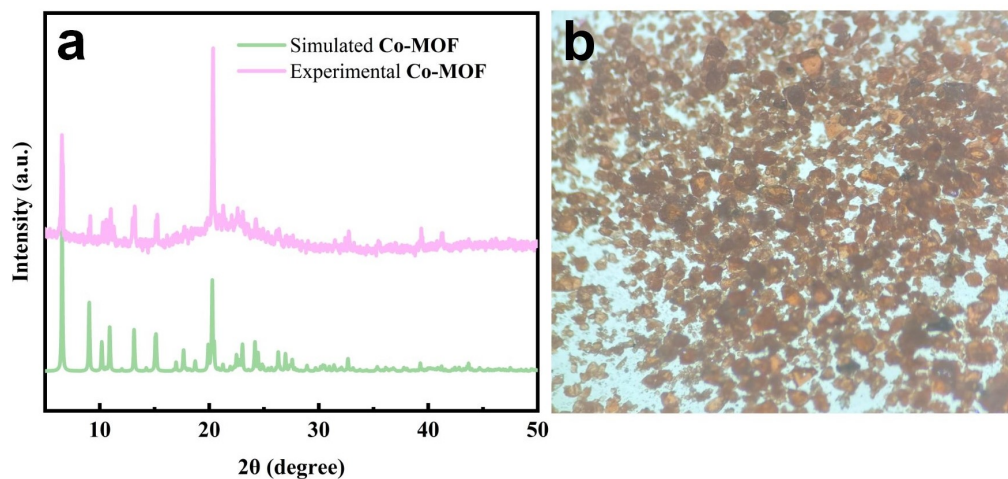

**Fig. S6** (a) Comparison between XRD test data and simulation data of Co-MOF. (b) A photo of Co-MOF under an optical microscope.

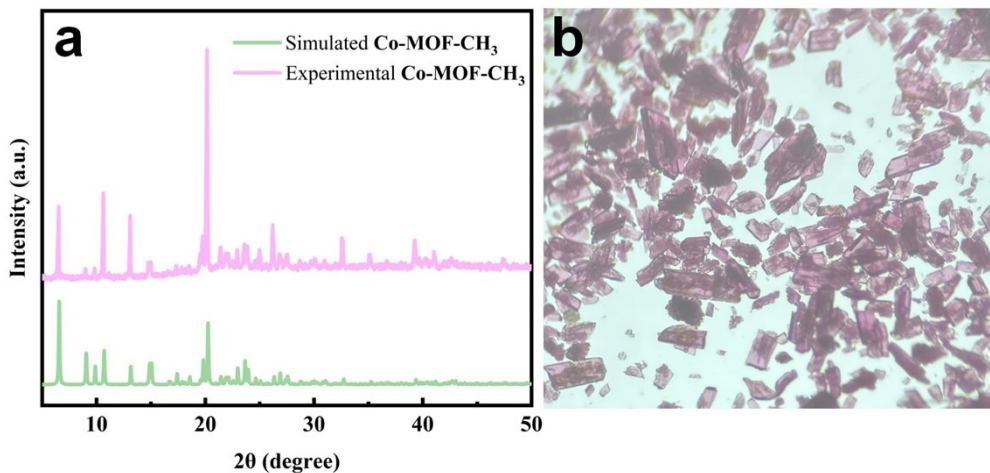

**Fig. S7** (a) Comparison between XRD test data and simulation data of Co-MOF-CH<sub>3</sub>.  
 (b) A photo of Co-MOF-CH<sub>3</sub> under an optical microscope.

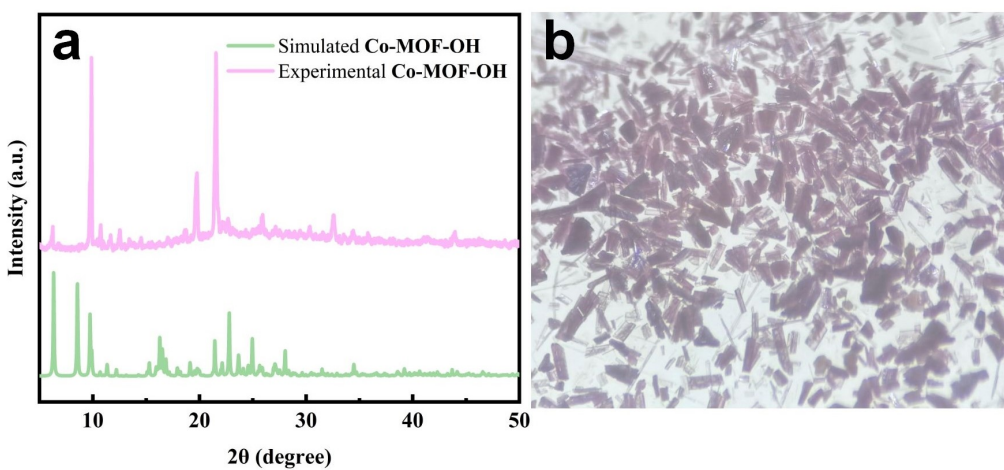

**Fig. S8** (a) Comparison between XRD test data and simulation data of Co-MOF-OH.  
 (b) A photo of Co-MOF-OH under an optical microscope.

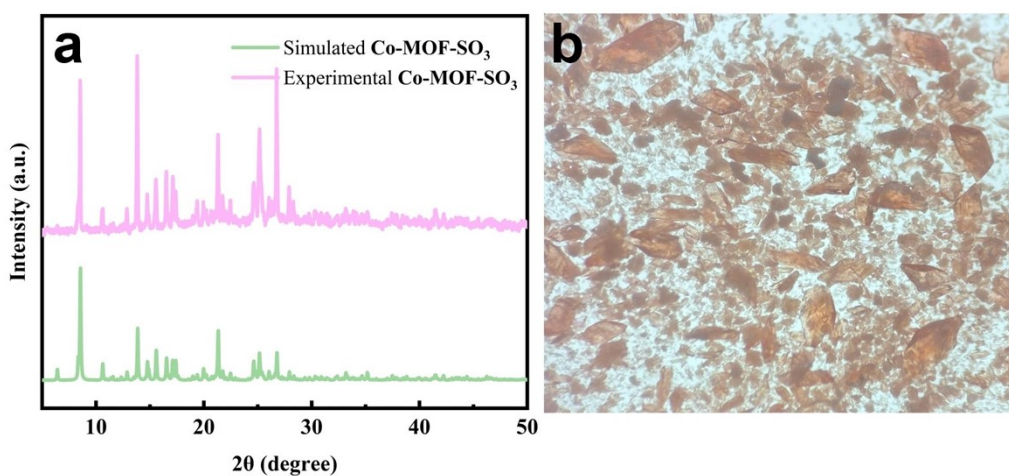

**Fig. S9** (a) Comparison between XRD test data and simulation data of Co-MOF-SO<sub>3</sub>.  
 (b) A photo of Co-MOF-SO<sub>3</sub> under an optical microscope.

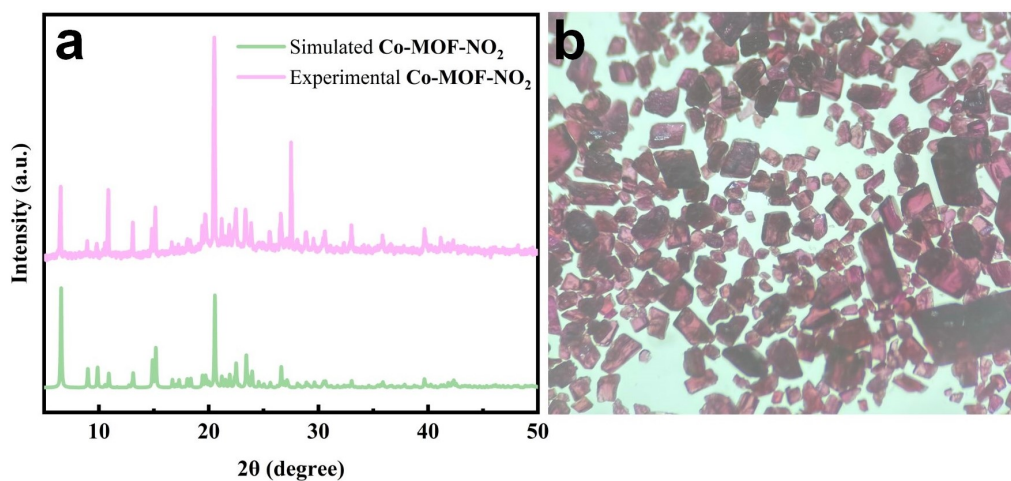

**Fig. S10** (a) Comparison between XRD test data and simulation data of Co-MOF-NO<sub>2</sub>. (b) A photo of Co-MOF-NO<sub>2</sub> under an optical microscope.

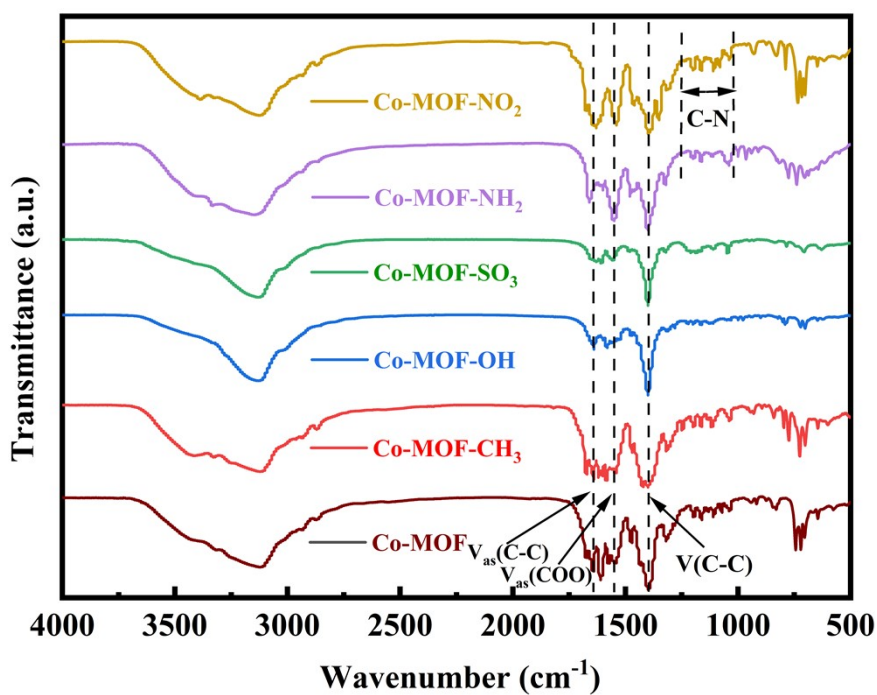

**Fig. S11** FTIR spectra of Co-MOF series.

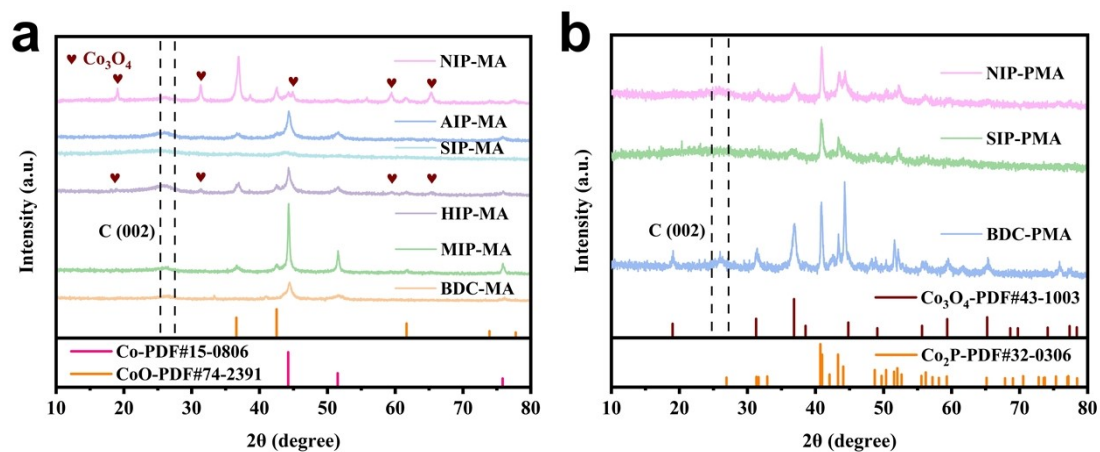

**Fig. S12** XRD patterns and phase analyses: (a) BDC-MA, MIP-MA, HIP-MA, SIP-MA, AIP-MA, NIP-MA; (b) BDC-PMA, SIP-PMA, NIP-PMA.

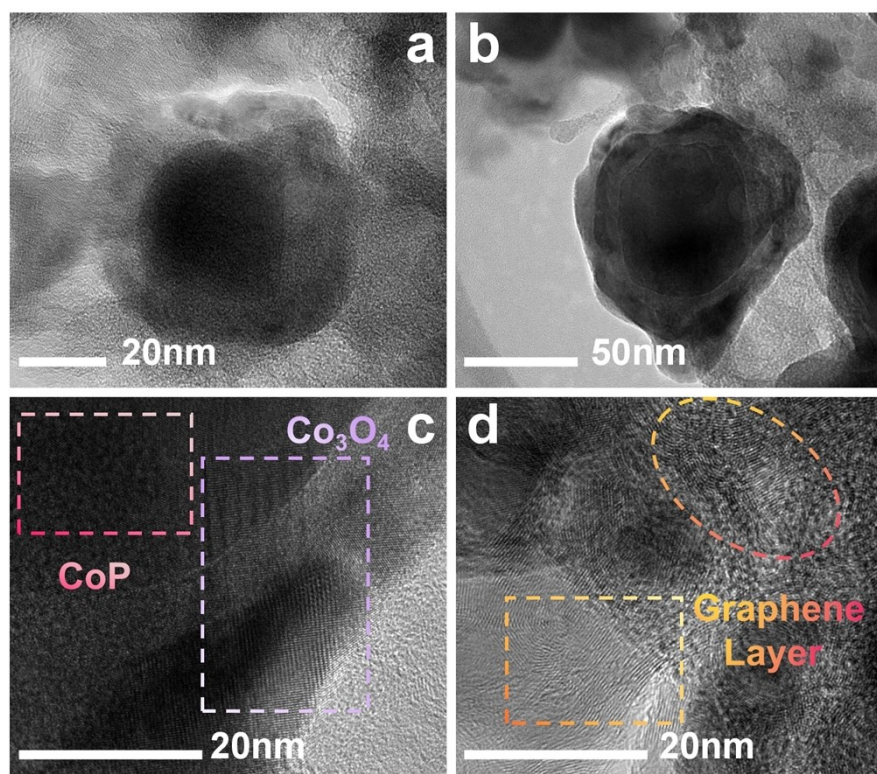

**Fig. S13** (a and b) TEM images of AIP-PMA. (c and d) HRTEM images of AIP-PMA.

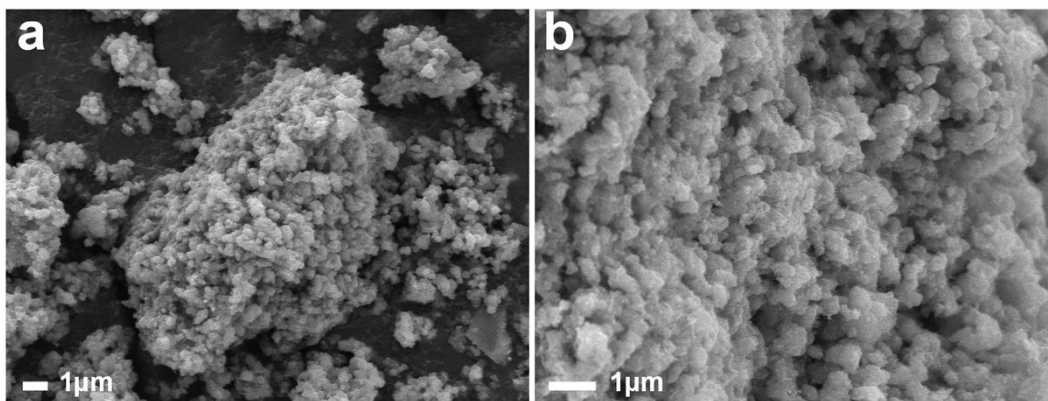

**Fig. S14** SEM images of BDC-MA.

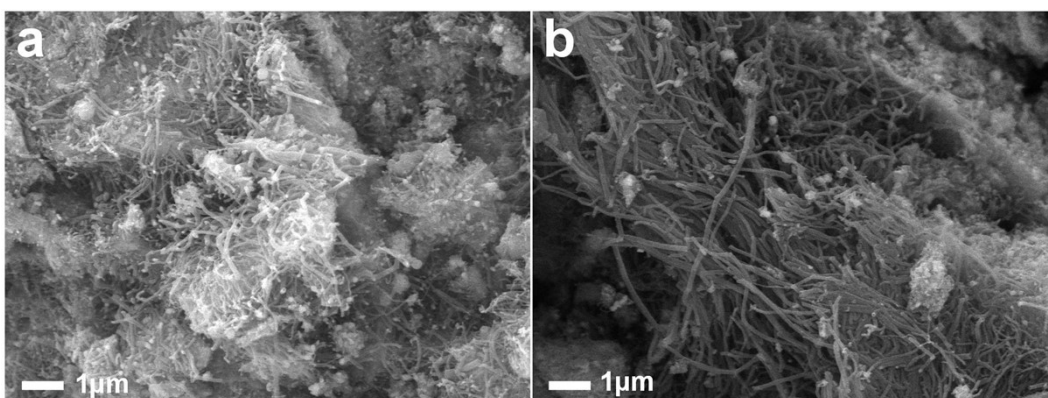

**Fig. S15** SEM images of MIP-MA.

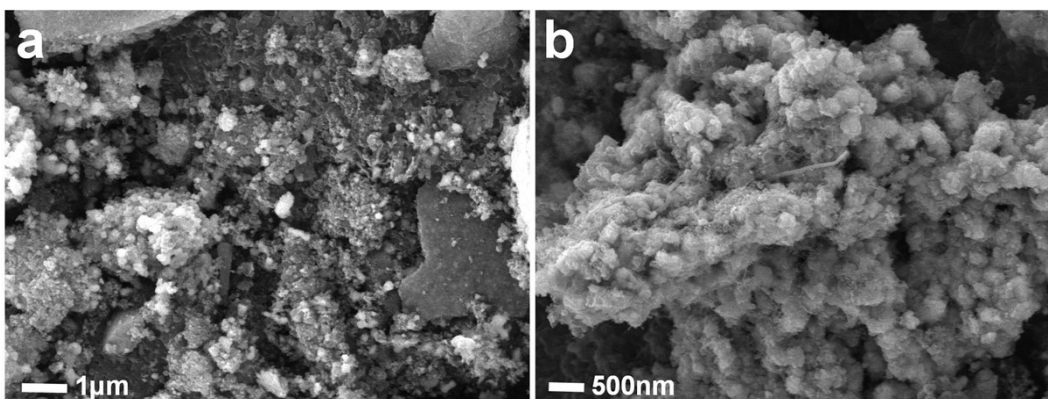

**Fig. S16** SEM images of HIP-MA.

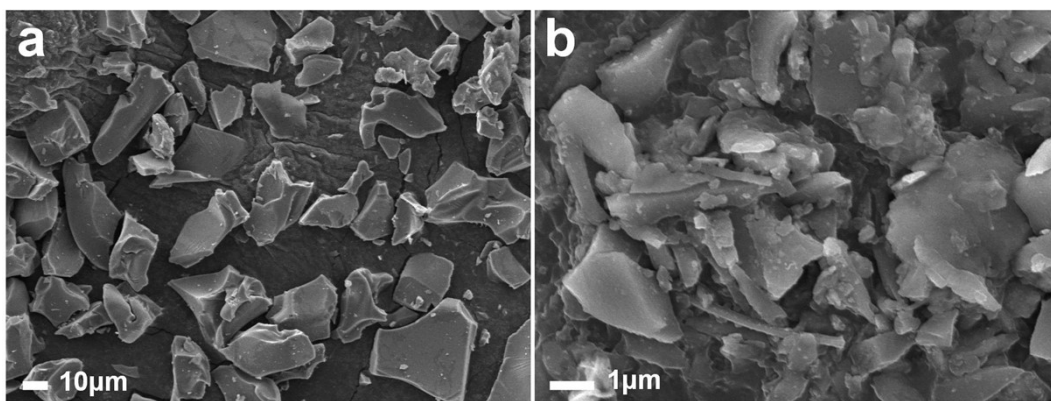

**Fig. S17** SEM images of SIP-MA.

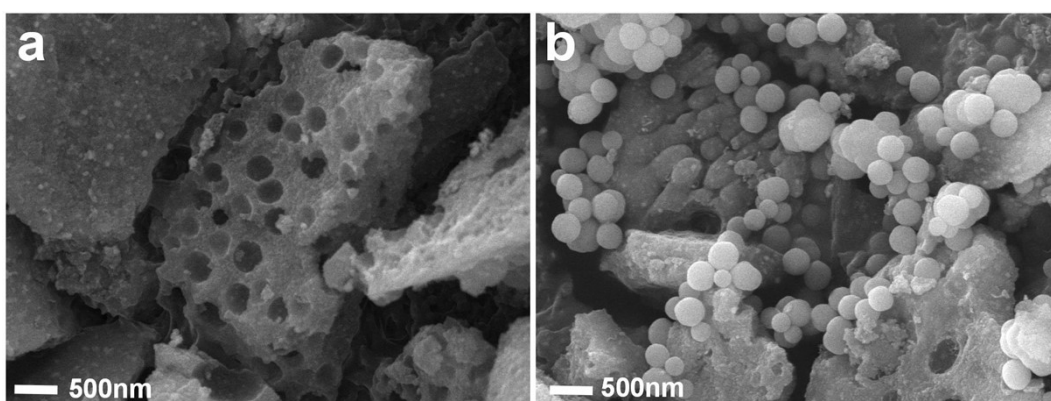

**Fig. S18** SEM images of AIP-MA.

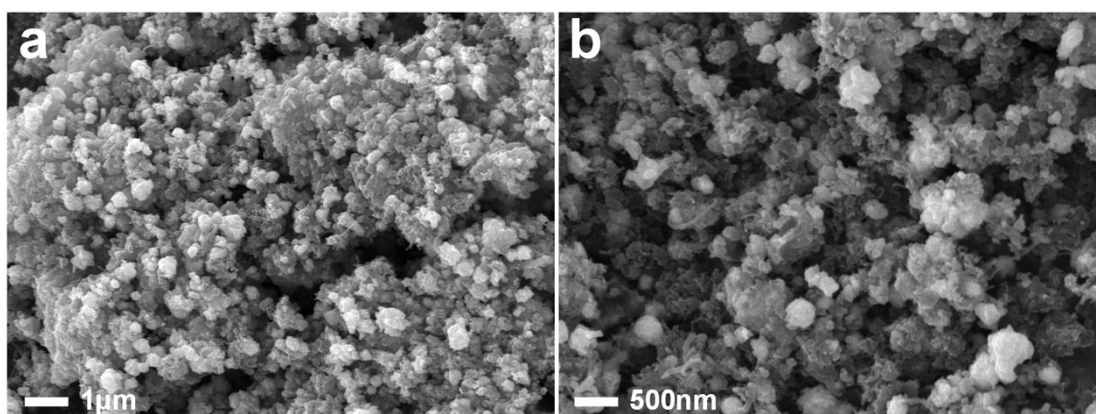

**Fig. S19** SEM images of NIP-MA.

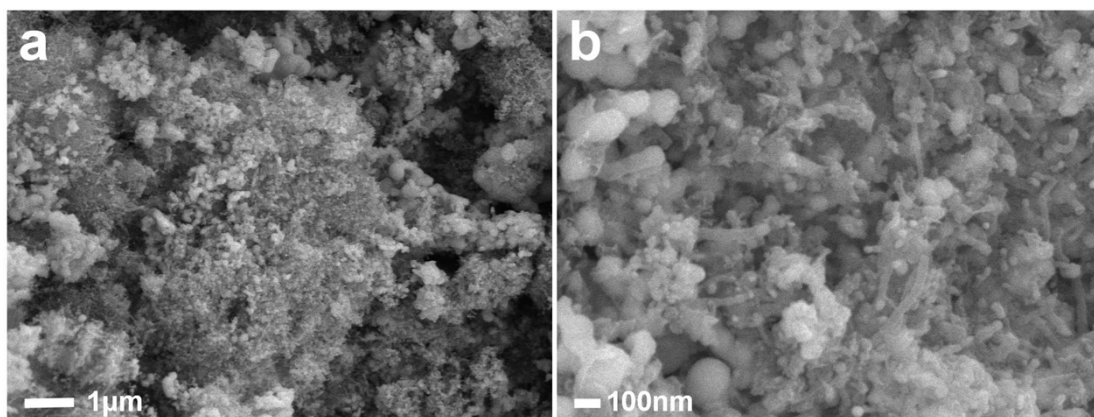

**Fig. S20** SEM images of BDC-PMA.

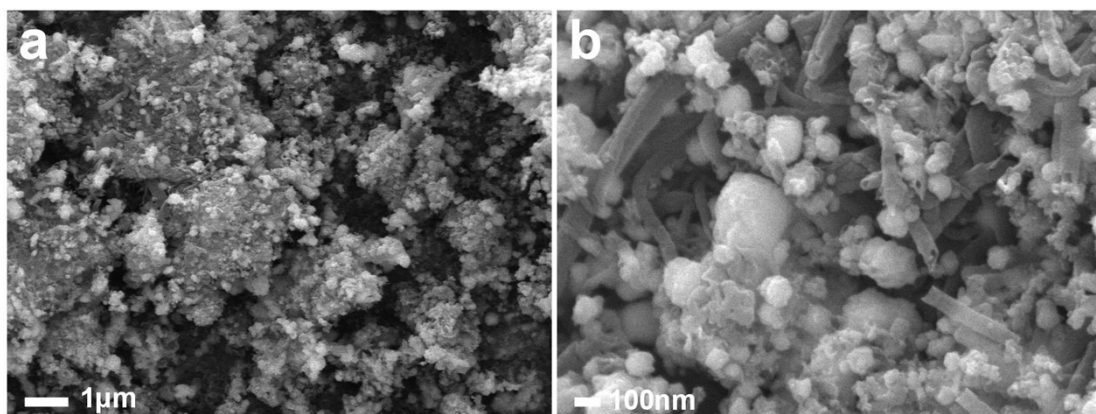

**Fig. S21** SEM images of MIP-PMA.

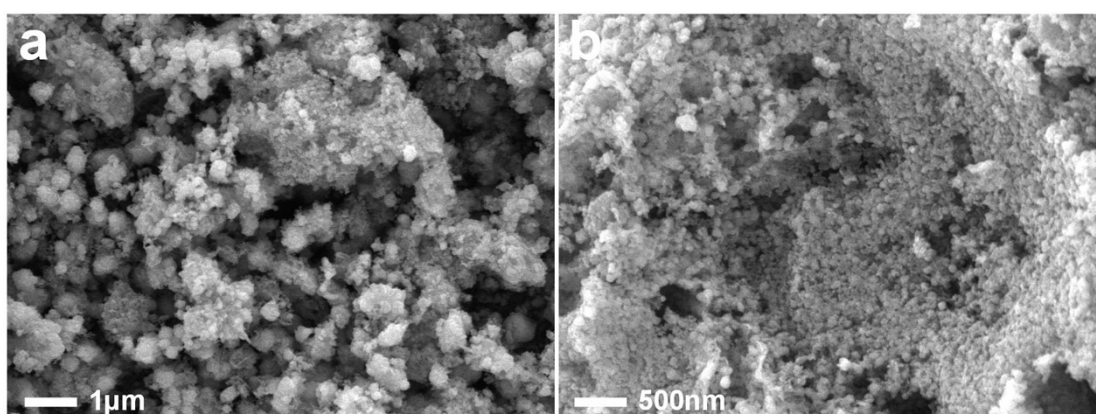

**Fig. S22** SEM images of HIP-PMA.



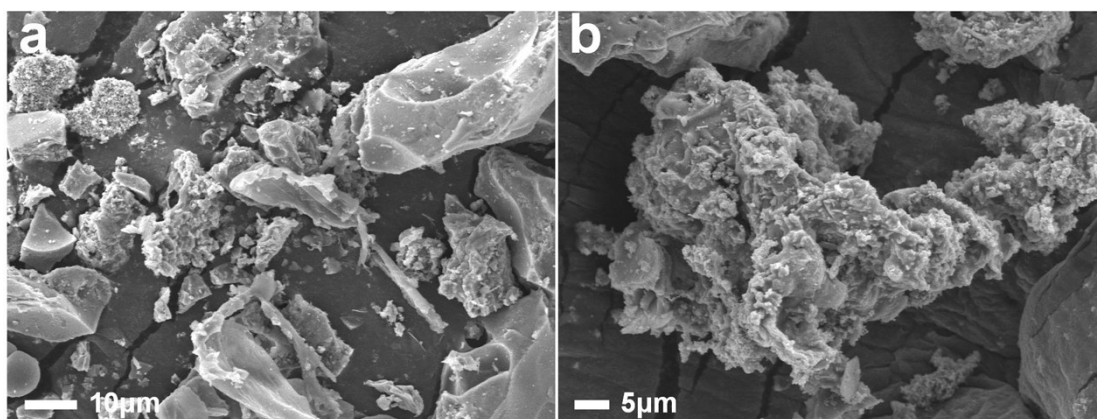

**Fig. S23** SEM images of SIP-PMA.

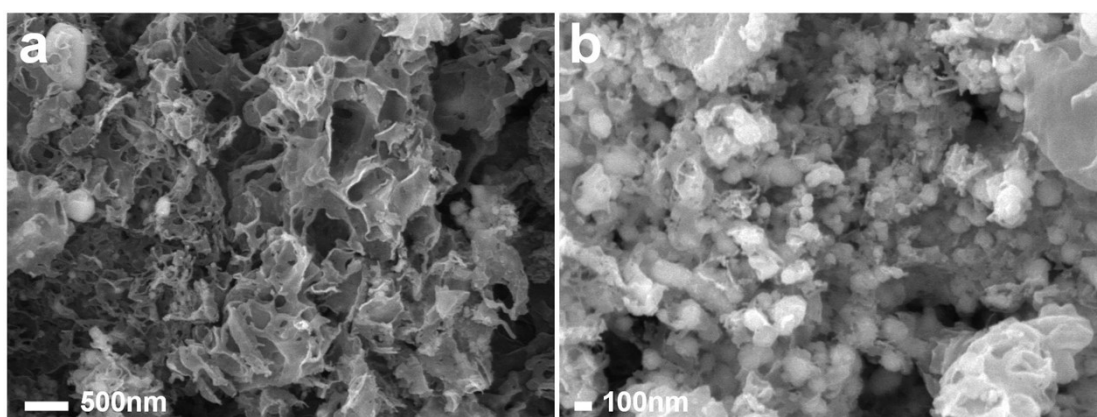

**Fig. S24** SEM images of NIP-PMA.

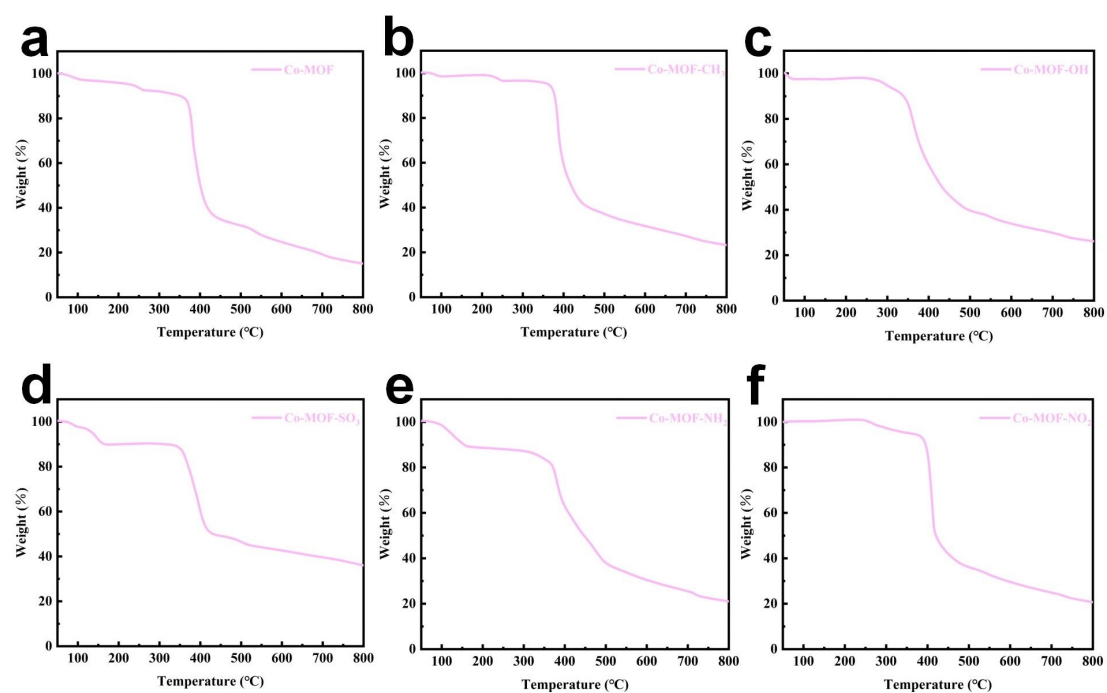

**Fig. S25** Thermogravimetric analysis: (a) Co-MOF, (b) Co-MOF-CH<sub>3</sub>, (c) Co-MOF-OH, (d) Co-MOF-SO<sub>3</sub>, (e) Co-MOF-NH<sub>2</sub> and (f) Co-MOF-NO<sub>2</sub>.

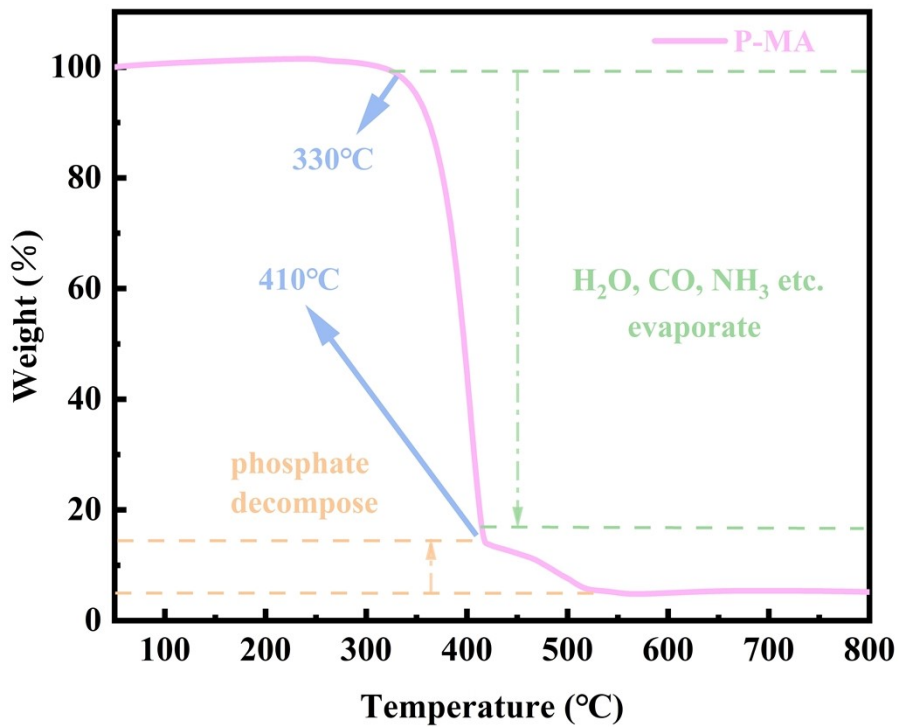

Fig. S26 Thermogravimetric analysis curve of melamine polyphosphate.

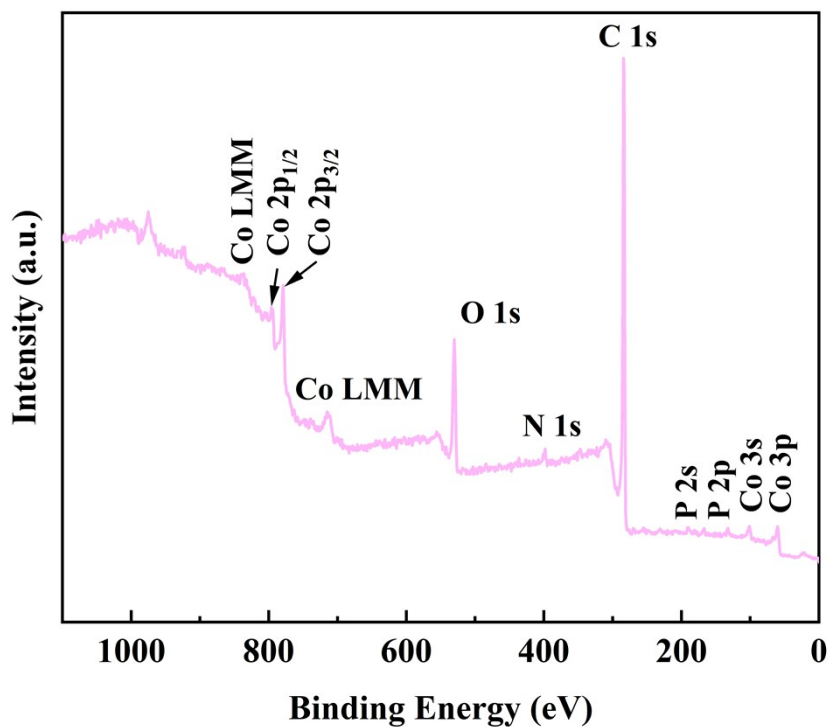

Fig. S27 XPS full spectrum of AIP-PMA.

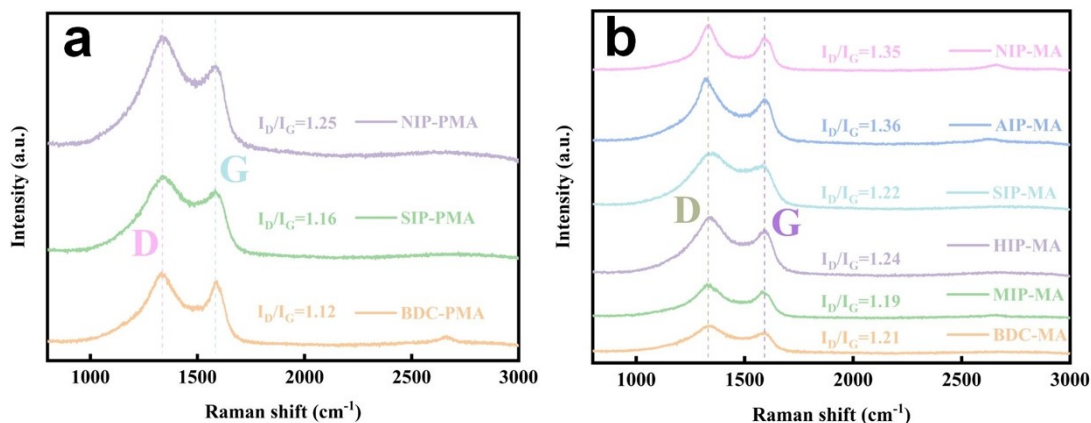

**Fig. S28** Raman spectra: (a) BDC-PMA, SIP-PMA and NIP-PMA; (b) BDC-MA, MIP-MA, HIP-MA, SIP-MA, AIP-MA, NIP-MA.

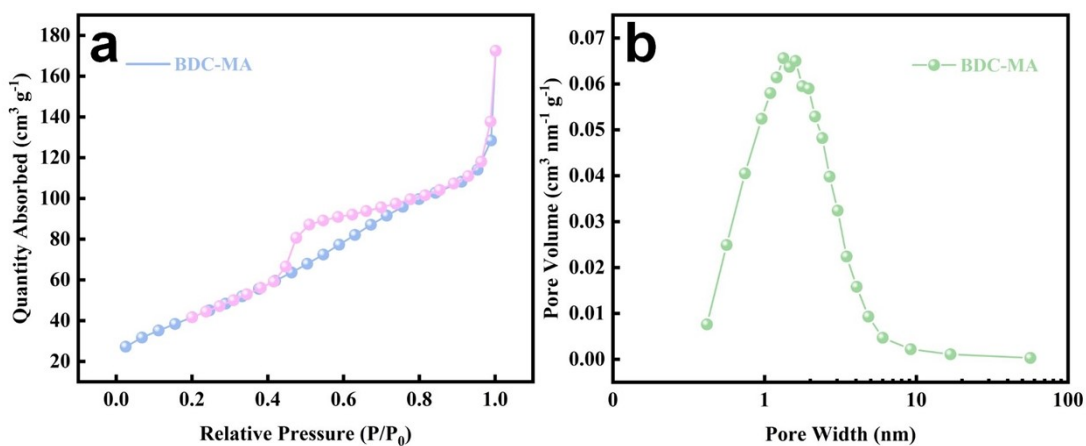

**Fig. S29** (a)  $\text{N}_2$  adsorption-desorption isotherms of BDC-MA. (b) The corresponding pore-size distribution plots for BDC-MA.

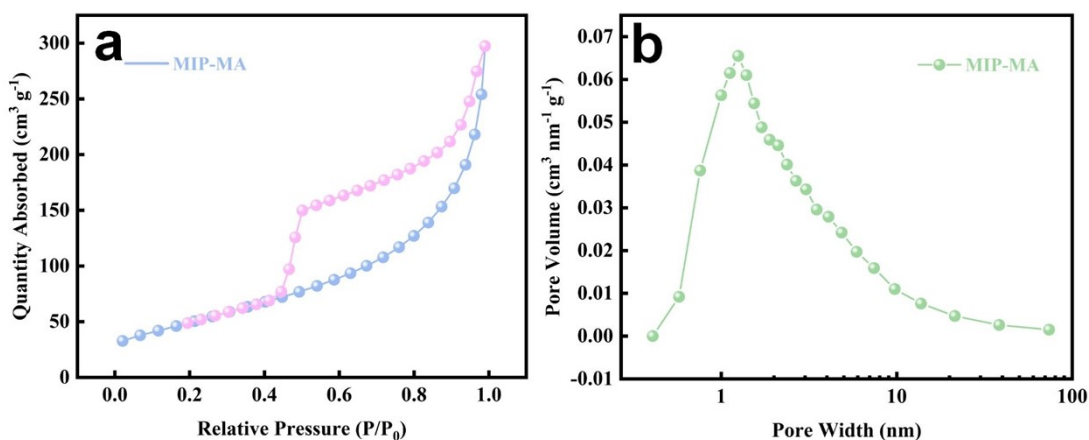

**Fig. S30** (a)  $\text{N}_2$  adsorption-desorption isotherms of MIP-MA. (b) The corresponding pore-size distribution plots for MIP-MA.

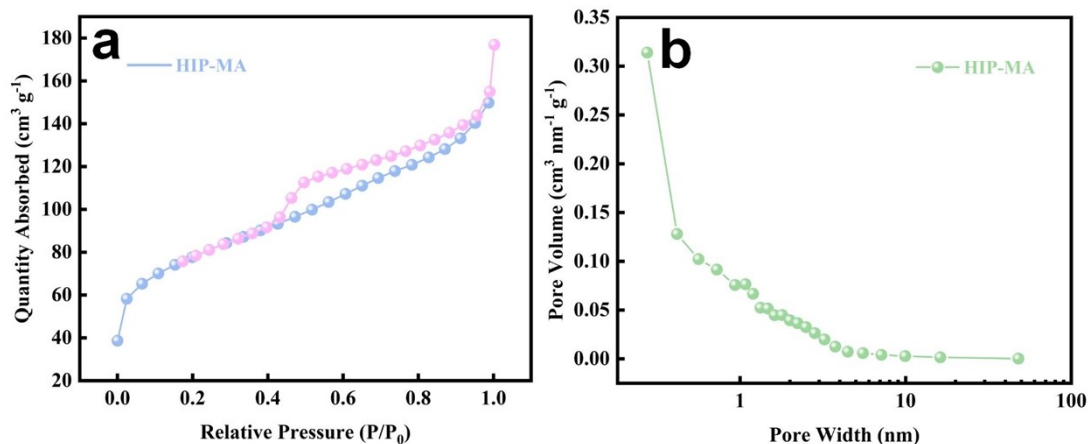

**Fig. S31** (a)  $N_2$  adsorption-desorption isotherms of HIP-MA. (b) The corresponding pore-size distribution plots for HIP-MA.

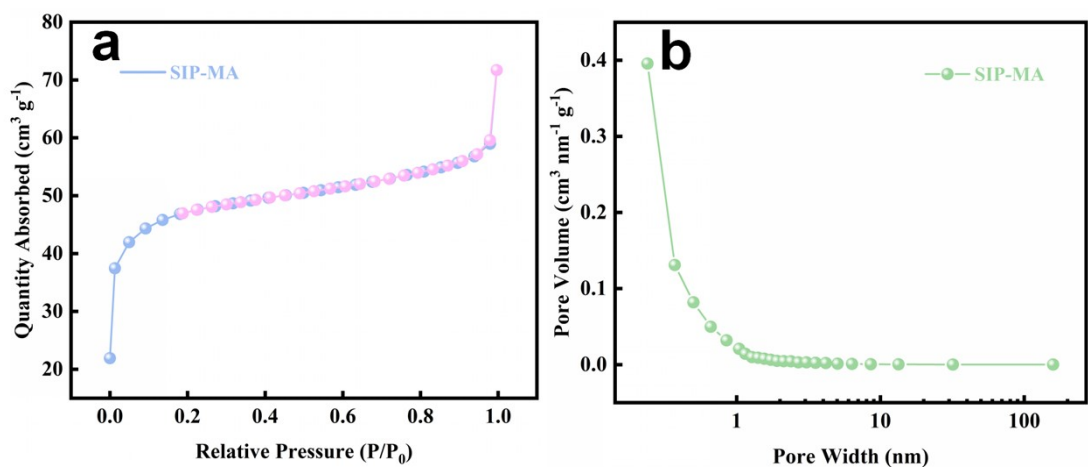

**Fig. S32** (a)  $N_2$  adsorption-desorption isotherms of SIP-MA. (b) The corresponding pore-size distribution plots for SIP-MA.

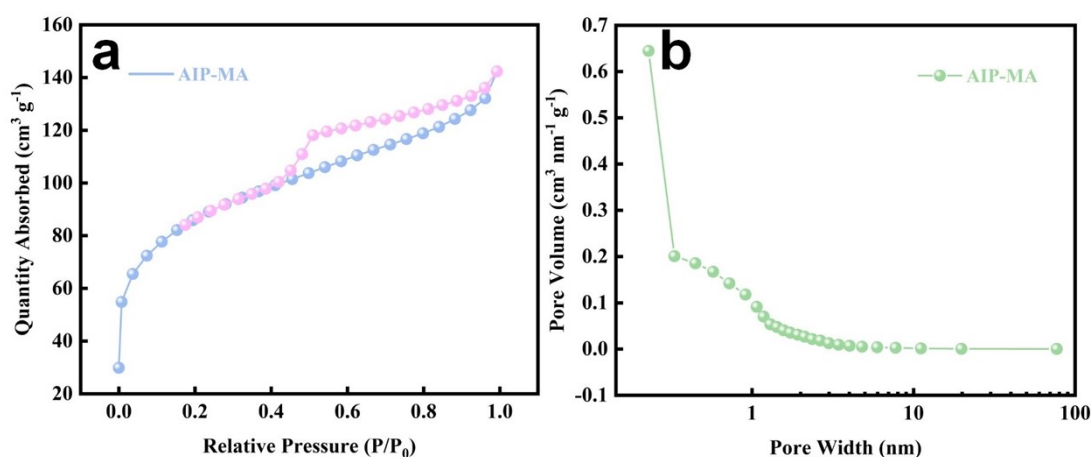

**Fig. S33** (a)  $N_2$  adsorption-desorption isotherms of AIP-MA. (b) The corresponding pore-size distribution plots for AIP-MA.

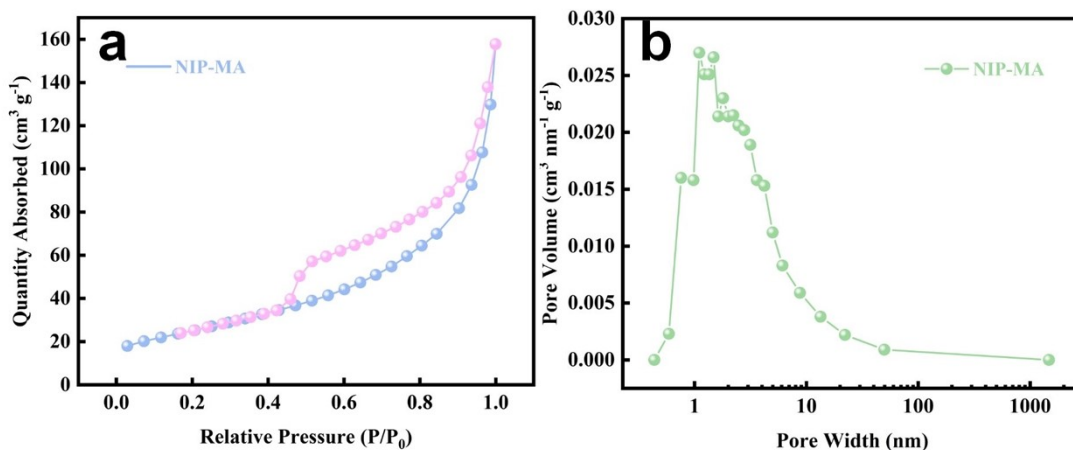

**Fig. S34** (a)  $N_2$  adsorption-desorption isotherms of NIP-MA. (b) The corresponding pore-size distribution plots for NIP-MA.

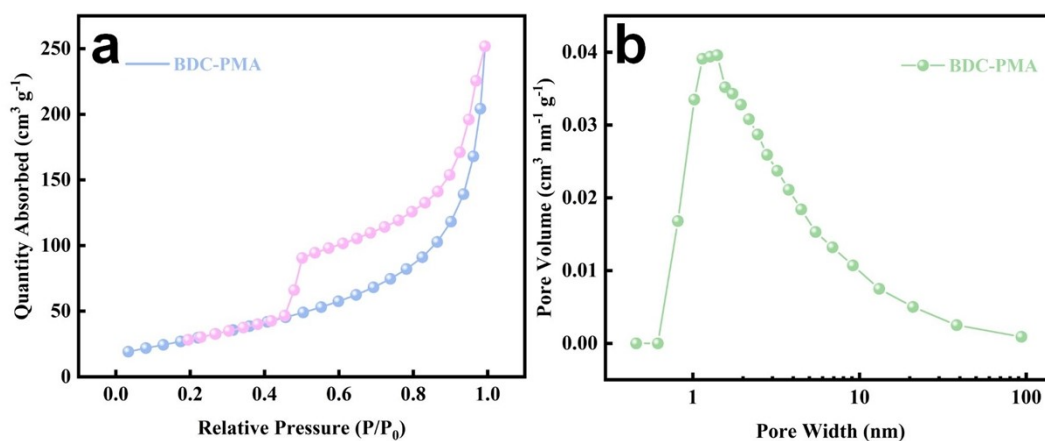

**Fig. S35** (a)  $N_2$  adsorption-desorption isotherms of BDC-PMA. (b) The corresponding pore-size distribution plots for BDC-PMA.

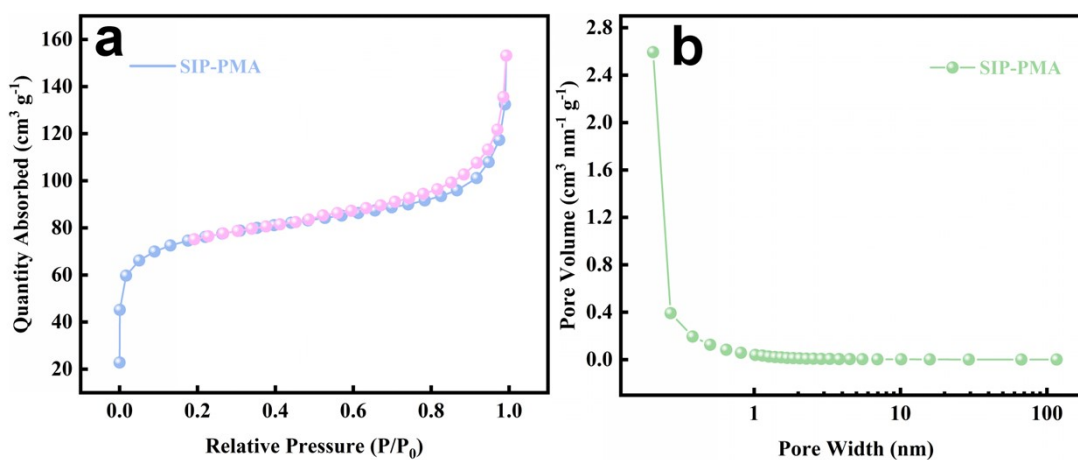

**Fig. S36** (a)  $N_2$  adsorption-desorption isotherms of SIP-PMA. (b) The corresponding pore-size distribution plots for SIP-PMA.

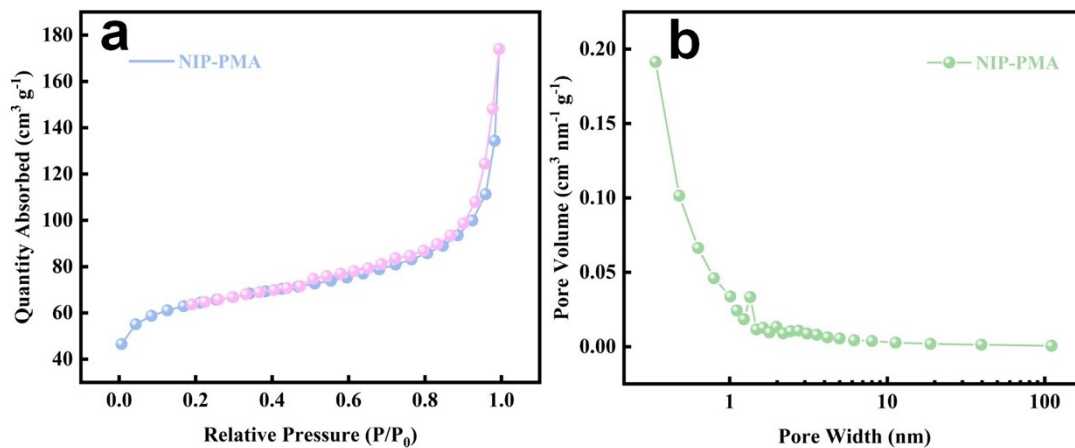

**Fig. S37** (a)  $N_2$  adsorption-desorption isotherms of NIP-PMA. (b) The corresponding pore-size distribution plots for NIP-PMA.

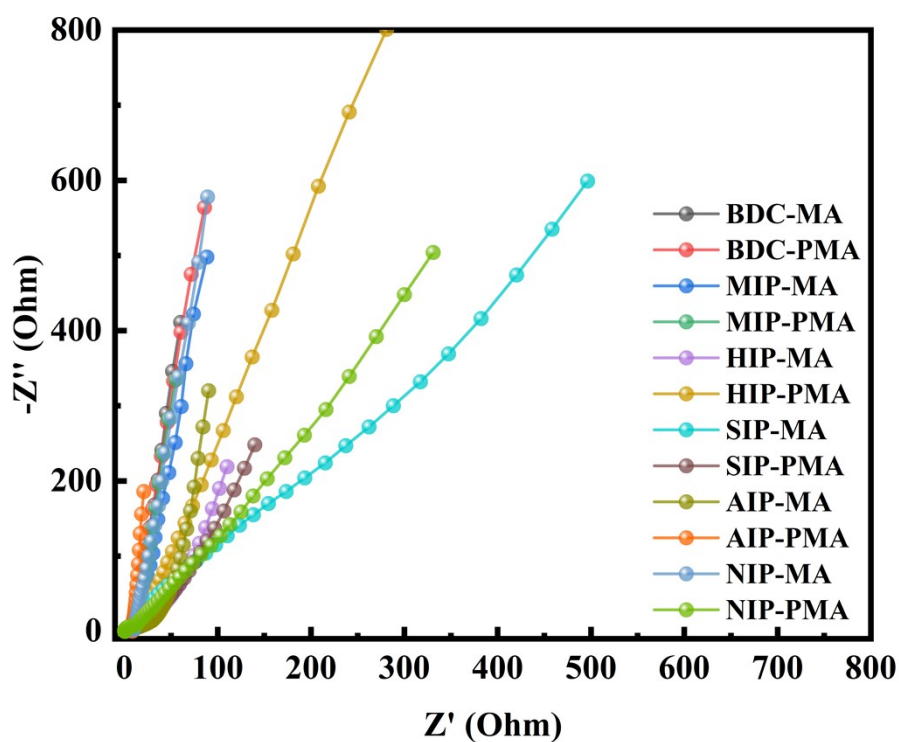

**Fig. S38** EIS test of different samples.

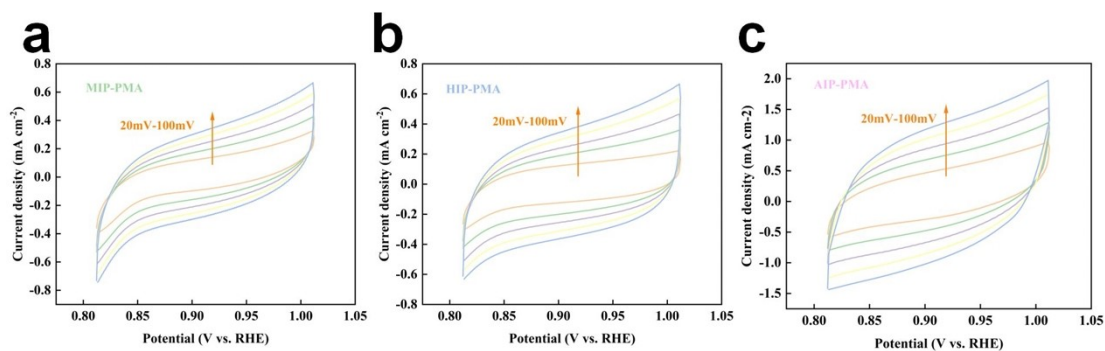

**Fig. S39** CV curves of (a) MIP-PMA. (b) HIP-PMA and (c) AIP-PMA in 1 M KOH electrolyte for OER during the different scan rate of 20 mV–100 mV.

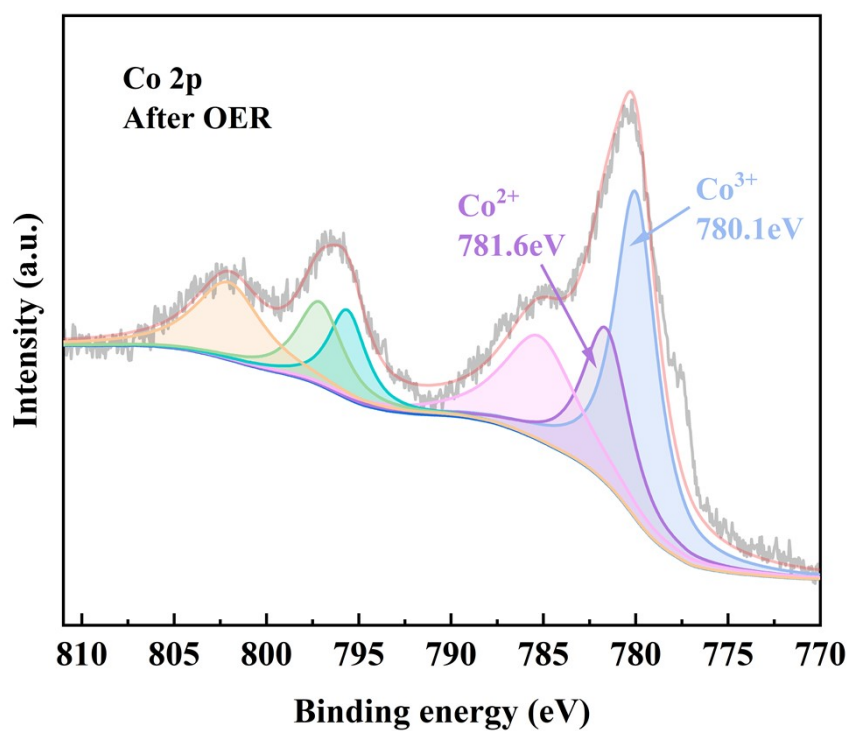

**Fig. S40** XPS spectra of Co 2p for AIP-PMA after OER test.

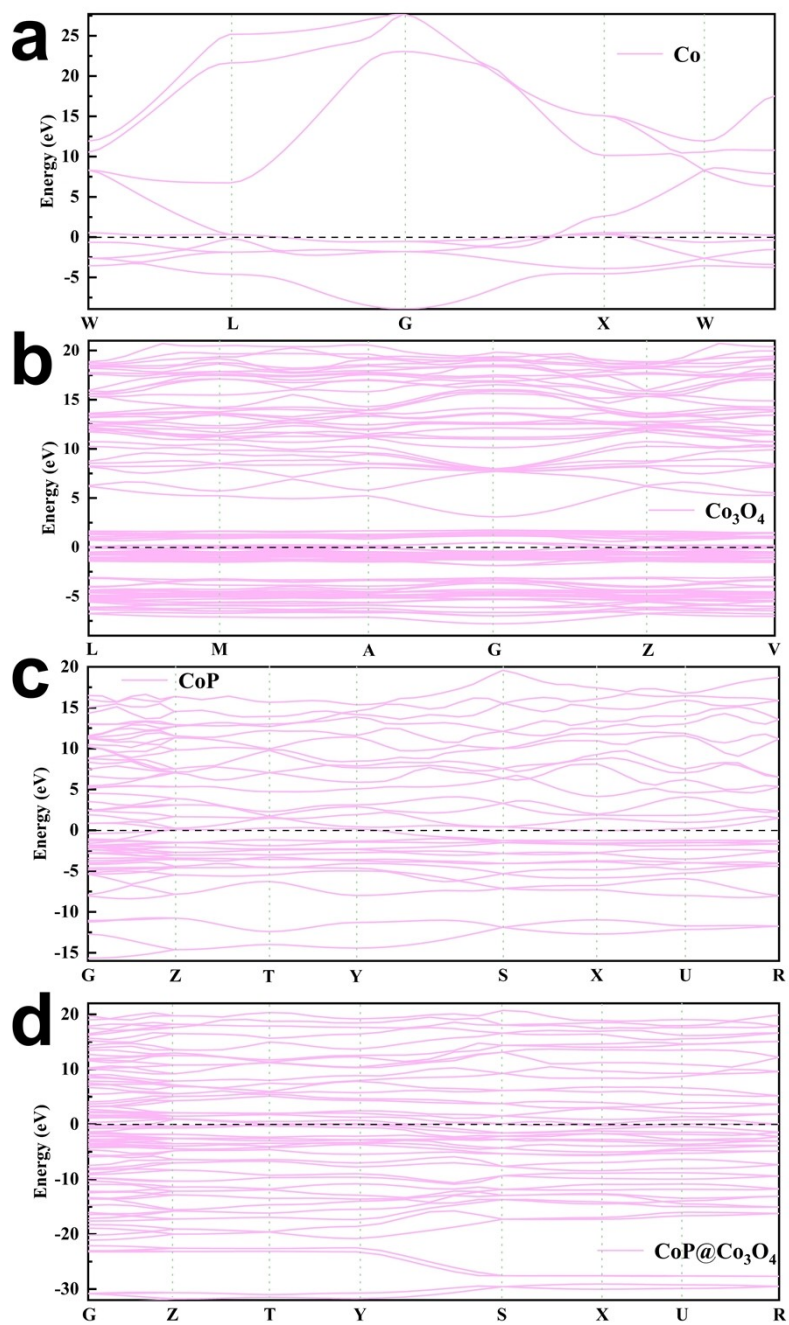

**Fig. S41** Band structure of a) Co. b) Co<sub>3</sub>O<sub>4</sub>. c) CoP and d) CoP@Co<sub>3</sub>O<sub>4</sub>.



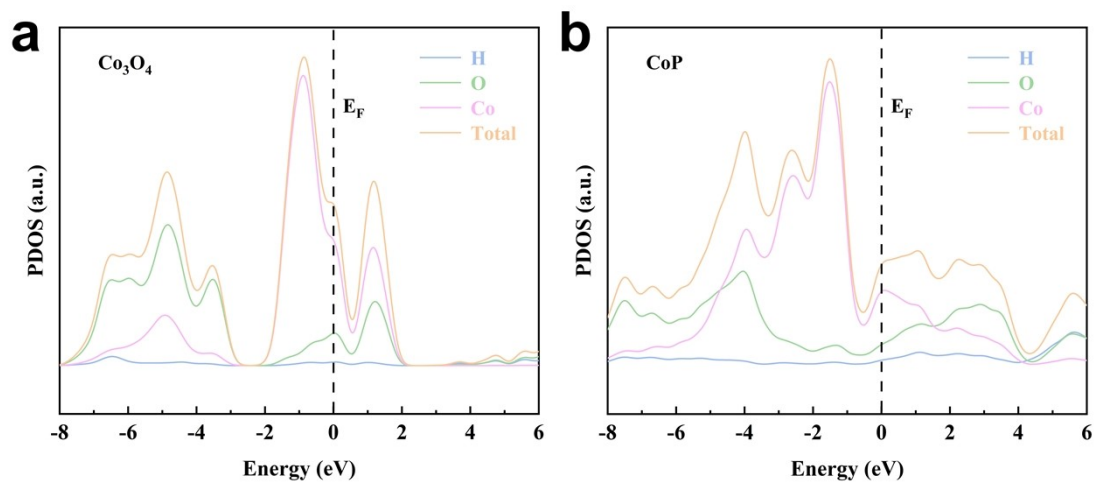

**Fig. S42** PDOS of a)  $\text{Co}_3\text{O}_4$  and b)  $\text{CoP}$ .

**Table S1** Crystallographic data for Co-MOFs.

| Co-MOF                                                          | Co-MOF-H                                                        | Co-MOF-CH <sub>3</sub>                                          | Co-MOF-NO <sub>2</sub>                                          | Co-MOF-OH                                                                      | Co-MOF-SO <sub>3</sub>                                                                         | Co-MOF-NH <sub>2</sub>                                          |
|-----------------------------------------------------------------|-----------------------------------------------------------------|-----------------------------------------------------------------|-----------------------------------------------------------------|--------------------------------------------------------------------------------|------------------------------------------------------------------------------------------------|-----------------------------------------------------------------|
| Empirical formula                                               | C <sub>24</sub> H <sub>24</sub> CoN <sub>4</sub> O <sub>7</sub> | C <sub>25</sub> H <sub>26</sub> CoN <sub>4</sub> O <sub>7</sub> | C <sub>24</sub> H <sub>23</sub> CoN <sub>5</sub> O <sub>9</sub> | C <sub>48</sub> H <sub>66</sub> Co <sub>2</sub> N <sub>8</sub> O <sub>25</sub> | C <sub>64</sub> H <sub>84</sub> Co <sub>3</sub> N <sub>12</sub> O <sub>32</sub> S <sub>2</sub> | C <sub>16</sub> H <sub>20</sub> CoN <sub>3</sub> O <sub>8</sub> |
| Formula weight                                                  | 539.40                                                          | 553.43                                                          | 584.40                                                          | 1272.95                                                                        | 1774.34                                                                                        | 441.28                                                          |
| Crystal system                                                  | Triclinic                                                       | Triclinic                                                       | Triclinic                                                       | Triclinic                                                                      | Triclinic                                                                                      | Triclinic                                                       |
| Space group                                                     | <i>P</i> − <i>I</i>                                             | <i>P</i> − <i>I</i>                                             | <i>P</i> − <i>I</i>                                             | <i>P</i> − <i>I</i>                                                            | <i>P</i> − <i>I</i>                                                                            | <i>P</i> − <i>I</i>                                             |
| <i>a</i> (Å)                                                    | 9.0683(6)                                                       | 9.3600(17)                                                      | 9.3224(7)                                                       | 10.0267(6)                                                                     | 8.918(2)                                                                                       | 8.4021(13)                                                      |
| <i>b</i> (Å)                                                    | 10.0561(7)                                                      | 10.0457(18)                                                     | 10.1497(8)                                                      | 11.4547(7)                                                                     | 14.271(3)                                                                                      | 9.9042(15)                                                      |
| <i>c</i> (Å)                                                    | 13.7972(10)                                                     | 13.755(2)                                                       | 13.7052(9)                                                      | 14.3490(8)                                                                     | 16.111(4)                                                                                      | 10.8986(16)                                                     |
| <i>α</i> (°)                                                    | 93.6960(10)                                                     | 92.924(5)                                                       | 93.929(2)                                                       | 78.351(2)                                                                      | 87.535(8)                                                                                      | 82.684(4)                                                       |
| <i>β</i> (°)                                                    | 100.9300(10)                                                    | 100.746(5)                                                      | 98.439(2)                                                       | 79.389(2)                                                                      | 87.535(8)                                                                                      | 84.928(4)                                                       |
| <i>γ</i> (°)                                                    | 101.8910(10)                                                    | 102.493(6)                                                      | 103.119(2)                                                      | 65.627(2)                                                                      | 74.767(7)                                                                                      | 79.377(4)                                                       |
| <i>V</i> (Å <sup>3</sup> )                                      | 1201.82(14)                                                     | 1234.9(4)                                                       | 1242.26(16)                                                     | 1460.81(15)                                                                    | 1972.3(8)                                                                                      | 882.2(2)                                                        |
| <i>Z</i>                                                        | 2                                                               | 2                                                               | 2                                                               | 1                                                                              | 1                                                                                              | 2                                                               |
| <i>D<sub>c</sub></i> (g cm <sup>−3</sup> )                      | 1.491                                                           | 1.488                                                           | 1.562                                                           | 1.447                                                                          | 1.494                                                                                          | 1.661                                                           |
| <i>R</i> <sub>int</sub>                                         | 0.0148                                                          | 0.0348                                                          | 0.0652                                                          | 0.0880                                                                         | 0.0221                                                                                         | 0.0181                                                          |
| GOF                                                             | 1.062                                                           | 1.017                                                           | 1.033                                                           | 1.021                                                                          | 1.026                                                                                          | 1.009                                                           |
| <i>R</i> <sub>I</sub> <sup>a</sup> [ <i>I</i> > 2σ( <i>I</i> )] | 0.0433                                                          | 0.0534                                                          | 0.0840                                                          | 0.0616                                                                         | 0.0524                                                                                         | 0.0372                                                          |
| <i>wR</i> <sub>2</sub> <sup>b</sup> (all data)                  | 0.1183                                                          | 0.1591                                                          | 0.2568                                                          | 0.1828                                                                         | 0.1826                                                                                         | 0.1049                                                          |

<sup>a</sup>  $R_1 = \sum ||F_o| - |F_c|| / \sum |F_o|$ , <sup>b</sup>  $wR_2 = \sum [w(F_o^2 - F_c^2)^2] / \sum [w(F_o^2)^2]^{1/2}$ .

**Table S2** Selected bond distances (Å) and angles (°) for Co-MOF-H.

|                     |            |                     |           |
|---------------------|------------|---------------------|-----------|
| Co(1)-O(4)#1        | 2.0321(19) | O(3)#2-Co(1)-N(2)#3 | 91.44(9)  |
| Co(1)-O(1)          | 2.033(2)   | O(4)#1-Co(1)-N(1)   | 87.01(9)  |
| Co(1)-O(3)#2        | 2.141(2)   | O(1)-Co(1)-N(1)     | 89.90(10) |
| Co(1)-N(2)#3        | 2.145(3)   | O(3)#2-Co(1)-N(1)   | 93.49(9)  |
| Co(1)-N(1)          | 2.155(3)   | N(2)#3-Co(1)-N(1)   | 174.96(9) |
| Co(1)-O(2)#2        | 2.312(2)   | O(4)#1-Co(1)-O(2)#2 | 89.09(8)  |
| O(4)#1-Co(1)-O(1)   | 123.76(8)  | O(1)-Co(1)-O(2)#2   | 146.97(8) |
| O(4)#1-Co(1)-O(3)#2 | 147.45(8)  | O(3)#2-Co(1)-O(2)#2 | 58.42(7)  |
| O(1)-Co(1)-O(3)#2   | 88.78(8)   | N(2)#3-Co(1)-O(2)#2 | 93.25(9)  |
| O(4)#1-Co(1)-N(2)#3 | 88.27(9)   | N(1)-Co(1)-O(2)#2   | 88.44(9)  |
| O(1)-Co(1)-N(2)#3   | 91.26(10)  |                     |           |

Symmetry codes: #1 -x+2, -y, -z+2; #2 -x+2, -y+1, -z+2; #3 x+1, y+1, z+1.

**Table S3** Selected bond distances (Å) and angles (°) for Co-MOF-CH<sub>3</sub>.

|                     |            |                     |           |
|---------------------|------------|---------------------|-----------|
| Co(1)-O(1)          | 2.0265(17) | O(3)#2-Co(1)-N(1)   | 90.25(8)  |
| Co(1)-O(2)#1        | 2.0284(19) | O(1)-Co(1)-N(2)#3   | 86.44(8)  |
| Co(1)-O(3)#2        | 2.1130(18) | O(2)#1-Co(1)-N(2)#3 | 89.00(9)  |
| Co(1)-N(1)          | 2.143(2)   | O(3)#2-Co(1)-N(2)#3 | 94.50(9)  |
| Co(1)-N(2)#3        | 2.154(2)   | N(1)-Co(1)-N(2)#3   | 174.80(8) |
| Co(1)-O(4)#2        | 2.352(2)   | O(1)-Co(1)-O(4)#2   | 89.46(7)  |
| O(1)-Co(1)-O(2)#1   | 122.19(8)  | O(2)#1-Co(1)-O(4)#2 | 147.88(7) |
| O(1)-Co(1)-O(3)#2   | 147.51(8)  | O(3)#2-Co(1)-O(4)#2 | 58.19(7)  |
| O(2)#1-Co(1)-O(3)#2 | 90.30(8)   | N(1)-Co(1)-O(4)#2   | 93.16(9)  |
| O(1)-Co(1)-N(1)     | 88.42(8)   | N(2)#3-Co(1)-O(4)#2 | 87.58(9)  |
| O(2)#1-Co(1)-N(1)   | 93.08(9)   |                     |           |

Symmetry codes: #1 -x, -y-1, -z-1; #2 x, y-1, z; #3 x+1, y+1, z+1.

**Table S4** Selected bond distances (Å) and angles (°) for Co-MOF-NO<sub>2</sub>.

|                     |            |                     |            |
|---------------------|------------|---------------------|------------|
| Co(1)-O(1)          | 2.031(4)   | O(3)#2-Co(1)-N(1)   | 91.46(18)  |
| Co(1)-O(2)#1        | 2.033(4)   | O(1)-Co(1)-N(2)     | 85.61(19)  |
| Co(1)-O(3)#2        | 2.138(4)   | O(2)#1-Co(1)-N(2)   | 89.99(19)  |
| Co(1)-N(1)          | 2.146(5)   | O(3)#2-Co(1)-N(2)   | 93.78(19)  |
| Co(1)-N(2)          | 2.154(5)   | N(1)-Co(1)-N(2)     | 173.76(18) |
| Co(1)-O(4)#2        | 2.295(4)   | O(1)-Co(1)-O(4)#2   | 93.97(15)  |
| O(1)-Co(1)-O(2)#1   | 119.25(17) | O(2)#1-Co(1)-O(4)#2 | 146.36(16) |
| O(1)-Co(1)-O(3)#2   | 152.73(17) | O(3)#2-Co(1)-O(4)#2 | 58.80(15)  |
| O(2)#1-Co(1)-O(3)#2 | 87.99(16)  | N(1)-Co(1)-O(4)#2   | 92.54(18)  |
| O(1)-Co(1)-N(1)     | 88.17(17)  | N(2)-Co(1)-O(4)#2   | 87.29(18)  |
| O(2)#1-Co(1)-N(1)   | 93.58(19)  |                     |            |

Symmetry codes: #1 -x+2, -y, -z+1; #2 x, y+1, z.

**Table S5** Selected bond distances (Å) and angles (°) for Co-MOF-OH.

|                 |            |                 |            |
|-----------------|------------|-----------------|------------|
| Co(1)-O(4)      | 2.011(3)   | O(2)-Co(1)-N(1) | 91.43(13)  |
| Co(1)-O(3)      | 2.032(3)   | O(4)-Co(1)-N(2) | 89.76(13)  |
| Co(1)-O(2)      | 2.123(3)   | O(3)-Co(1)-N(2) | 87.84(13)  |
| Co(1)-N(1)      | 2.144(3)   | O(2)-Co(1)-N(2) | 92.00(13)  |
| Co(1)-N(2)      | 2.151(3)   | N(1)-Co(1)-N(2) | 176.30(13) |
| Co(1)-O(1)      | 2.344(3)   | O(4)-Co(1)-O(1) | 148.33(11) |
| O(4)-Co(1)-O(3) | 124.47(12) | O(3)-Co(1)-O(1) | 87.11(10)  |
| O(4)-Co(1)-O(2) | 90.50(12)  | O(2)-Co(1)-O(1) | 57.92(10)  |
| O(3)-Co(1)-O(2) | 145.02(12) | N(1)-Co(1)-O(1) | 91.58(12)  |
| O(4)-Co(1)-N(1) | 91.60(13)  | N(2)-Co(1)-O(1) | 89.07(12)  |
| O(3)-Co(1)-N(1) | 88.55(12)  |                 |            |

**Table S6** Selected bond distances (Å) and angles (°) for Co-MOF-SO<sub>3</sub>.

|                   |            |                      |           |
|-------------------|------------|----------------------|-----------|
| Co(1)-O(3)        | 2.0640(19) | O(3)-Co(1)-N(1)      | 92.44(9)  |
| Co(1)-O(1W)       | 2.092(2)   | O(1W)-Co(1)-N(1)     | 92.37(9)  |
| Co(1)-O(2W)       | 2.093(2)   | O(2W)-Co(1)-N(1)     | 87.87(9)  |
| Co(1)-O(3W)       | 2.118(2)   | O(3W)-Co(1)-N(1)     | 87.82(9)  |
| Co(1)-N(5)        | 2.164(2)   | N(5)-Co(1)-N(1)      | 177.45(8) |
| Co(1)-N(1)        | 2.179(2)   | O(1)#1-Co(2)-O(1)    | 180.0     |
| Co(2)-O(1)#1      | 2.0406(18) | O(1)#1-Co(2)-O(4W)   | 88.86(8)  |
| Co(2)-O(4W)       | 2.151(2)   | O(1)-Co(2)-O(4W)     | 91.14(8)  |
| Co(2)-O(4W)#1     | 2.151(2)   | O(1)#1-Co(2)-O(4W)#1 | 91.14(8)  |
| Co(2)-N(2)#1      | 2.179(2)   | O(1)-Co(2)-O(4W)#1   | 88.86(8)  |
| Co(2)-N(2)        | 2.179(2)   | O(4W)-Co(2)-O(4W)#1  | 180.0     |
| O(3)-Co(1)-O(1W)  | 91.75(9)   | O(1)#1-Co(2)-N(2)#1  | 88.96(9)  |
| O(3)-Co(1)-O(2W)  | 87.70(9)   | O(1)-Co(2)-N(2)#1    | 91.04(8)  |
| O(1W)-Co(1)-O(2W) | 179.41(9)  | O(4W)-Co(2)-N(2)#1   | 92.94(8)  |
| O(3)-Co(1)-O(3W)  | 176.16(10) | O(4W)#1-Co(2)-N(2)#1 | 87.06(8)  |
| O(1W)-Co(1)-O(3W) | 92.07(10)  | O(1)#1-Co(2)-N(2)    | 91.04(9)  |
| O(2W)-Co(1)-O(3W) | 88.48(11)  | O(1)-Co(2)-N(2)      | 88.96(9)  |
| O(3)-Co(1)-N(5)   | 89.87(9)   | O(4W)-Co(2)-N(2)     | 87.05(8)  |
| O(1W)-Co(1)-N(5)  | 88.66(9)   | O(4W)#1-Co(2)-N(2)   | 92.94(8)  |
| O(2W)-Co(1)-N(5)  | 91.13(9)   | N(2)#1-Co(2)-N(2)    | 180.0     |
| O(3W)-Co(1)-N(5)  | 89.81(9)   |                      |           |

Symmetry codes: #1 -x+1, -y, -z+1.

**Table S7** Selected bond distances (Å) and angles (°) for Co-MOF-NH<sub>2</sub>.

---

|                    |            |                     |           |
|--------------------|------------|---------------------|-----------|
| Co(1)-O(1W)        | 2.1068(15) | O(4)#1-Co(1)-N(1)   | 91.53(6)  |
| Co(1)-O(1)         | 2.1341(16) | O(1W)-Co(1)-N(3)#2  | 86.60(6)  |
| Co(1)-O(4)#1       | 2.1458(15) | O(1)-Co(1)-N(3)#2   | 93.32(6)  |
| Co(1)-N(1)         | 2.1516(18) | O(4)#1-Co(1)-N(3)#2 | 90.40(6)  |
| Co(1)-N(3)#2       | 2.2514(17) | N(1)-Co(1)-N(3)#2   | 174.75(6) |
| Co(1)-O(3)#1       | 2.3007(15) | O(1W)-Co(1)-O(3)#1  | 86.30(6)  |
| O(1W)-Co(1)-O(1)   | 131.99(6)  | O(1)-Co(1)-O(3)#1   | 141.69(6) |
| O(1W)-Co(1)-O(4)#1 | 144.93(6)  | O(4)#1-Co(1)-O(3)#1 | 58.64(6)  |
| O(1)-Co(1)-O(4)#1  | 83.05(6)   | N(1)-Co(1)-O(3)#1   | 89.58(6)  |
| O(1W)-Co(1)-N(1)   | 89.01(7)   | N(3)#2-Co(1)-O(3)#1 | 87.26(6)  |
| O(1)-Co(1)-N(1)    | 91.76(7)   |                     |           |

---

Symmetry codes: #1 x, y+1, z; #2 -x+2, -y, -z.

**Table S8** Comparison of OER performance for some Co-based electrocatalysts reported in 1M KOH solution.

| Catalyst                                                                | Electrode         | $\eta_{10}$ (mV) | Tafel slope (mV dec <sup>-1</sup> ) | Reference                                                          |
|-------------------------------------------------------------------------|-------------------|------------------|-------------------------------------|--------------------------------------------------------------------|
| Co <sub>2</sub> P/CoNPC                                                 | GC                | 328              | 78                                  | <i>Adv. Mater.</i><br>2020, <b>32</b> , 2003649                    |
| CoMe                                                                    | GC                | 350              | 116.7                               | <i>Adv. Funct. Mater.</i><br>2021, <b>31</b> , 2009245             |
| Co-C <sub>3</sub> N <sub>4</sub> /CNT                                   | RRDE              | 380              | 82                                  | <i>Adv. Mater.</i><br>2020, <b>32</b> , 2003134                    |
| Co-Mo <sub>2</sub> C-CN <sub>x</sub> -2                                 | GC                | 338              | 70                                  | <i>Appl. Catal. B: Environ.</i><br>2021, <b>284</b> , 119738       |
| CoBDC                                                                   | BiVO <sub>4</sub> | 400              | 80                                  | <i>ACS Nano</i><br>2022, <b>16</b> , 9523                          |
| MOF-Fe/Co                                                               | GC                | 427              | 156                                 | <i>Angew. Chem. Int. Ed.</i><br>2021, <b>60</b> , 12097            |
| Co <sub>2</sub> P/Mo <sub>3</sub> Co <sub>3</sub> C/Mo <sub>2</sub> C@C | GC                | 362              | 82                                  | <i>J. Mater. Chem. A</i> ,<br>2018, <b>6</b> , 5789                |
| CoP <sub>3</sub> CPs                                                    | CP                | 343              | 76                                  | <i>Phys. Chem. Chem. Phys.</i><br>2017, <b>19</b> , 2104.          |
| M-MoS <sub>2</sub> @Co                                                  | GC                | 370              | 90                                  | <i>Environ. Energy Mater.</i><br>2024, <b>10</b> , 1002/eem2.12702 |
| Mo-Co <sub>3</sub> O <sub>4</sub> NFs                                   | GC                | 362              | 96.2                                | <i>Adv. Funct. Mater.</i><br>2022, <b>32</b> , 2107382             |
| CoP@Co <sub>3</sub> O <sub>4</sub> /N-doped graphene                    | GC                | 320              | 78.9                                | This work                                                          |

## Reference

- 1 X. L. Wang, J. Luan, H. Y. Lin, Q. L. Lu, C. Xu and G. C. Liu, *Dalton Trans.* 2013, **42**, 8375-8386.
- 2 G. M. Sheldrick, *Acta Crystallogr. Sect. A: Found. Crystallogr.* 2008, **64**, 112-122.
- 3 J. P. Perdew, K. Burke and M. Ernzerhof, *Phys. Rev. Lett.* 1996, **77**, 3865.
- 4 B. Hammer, L. B. Hansen and J. K. Nørskov, *Phys. Rev. B* 1999, **59**, 7413.
- 5 J. K. Nørskov, J. Rossmeisl, A. Logadottir, L. Lindqvist, J. R. Kitchin, T. Bligaard and H. Jonsson, *J. Phys. Chem. B*, 2004, **108**, 17886.
